1  
2  
3  
4  
5  
6  
7  
8  
9  
10  
11  
12  
13  
14  
15  
16  
17  
18  
19  
20  
21  
22  
23  
24  
25

**TIM-1 SERVES AS A NONREDUNDANT RECEPTOR FOR EBOLA  
VIRUS, ENHANCING VIREMIA AND PATHOGENESIS**

Bethany Brunton<sup>#</sup>, Kai Rogers, Elisabeth K. Phillips, Rachel B. Brouillette, Ruayda

Bouls, Noah S. Butler and Wendy Maury\*

Department of Microbiology and Immunology, University of Iowa, Iowa City, IA

52242

Short title: TIM-1 enhances Ebola virus pathogenesis

\* Corresponding author:

3-750 Bowen Science Building

51 Newton Rd.

Iowa City, IA 52242

319 335 8021

# Current address:

Department of Molecular Medicine

Mayo Clinic

200 First St. SW

Rochester, MN 55905

26

27 ***Abstract***

28 *Background.* T cell immunoglobulin mucin domain-1 (TIM-1) is a phosphatidylserine (PS)  
29 receptor, mediating filovirus entry into cells through interactions with PS on virions. TIM-1  
30 expression has been implicated in Ebola virus (EBOV) pathogenesis; however, it remains  
31 unclear whether this is due to TIM-1 serving as a filovirus receptor in vivo or, as others have  
32 suggested, TIM-1 induces a cytokine storm elicited by T cell/virion interactions. Here, we use a  
33 BSL2 model virus that expresses EBOV glycoprotein and demonstrate the importance of TIM-1  
34 as a virus receptor late during in vivo infection.

35 *Methodology/Principal findings.* We used an infectious, recombinant vesicular stomatitis virus  
36 expressing EBOV glycoprotein (EBOV GP/rVSV) to assess the role of TIM-1 during in vivo  
37 infection. TIM-1-sufficient or TIM-1-deficient BALB/c interferon  $\alpha/\beta$  receptor<sup>-/-</sup> mice were  
38 challenged with EBOV GP/rVSV-GFP or G/rVSV-GFP. While G/rVSV caused profound  
39 morbidity and mortality in both mouse strains, TIM-1-deficient mice had significantly better  
40 survival than TIM-1-expressing mice following EBOV GP/rVSV challenge. EBOV GP/rVSV  
41 load in spleen was high and unaffected by expression of TIM-1. However, infectious virus in  
42 serum, liver, kidney and adrenal gland was reduced late in infection in the TIM-1-deficient mice,  
43 suggesting that virus entry via this receptor contributes to virus load. Consistent with higher  
44 virus loads, proinflammatory chemokines trended higher in organs from infected TIM-1-  
45 sufficient mice compared to the TIM-1-deficient mice, but proinflammatory cytokines were more  
46 modestly affected. To assess the role of T cells in EBOV GP/rVSV pathogenesis, T cells were  
47 depleted in TIM-1-sufficient and -deficient mice and the mice were challenged with virus.  
48 Depletion of T cells did not alter the pathogenic consequences of virus infection.

49 *Conclusions.* Our studies provide evidence that at late times during EBOV GP/rVSV infection,  
50 TIM-1 increased virus load and associated mortality, consistent with an important role of this  
51 receptor in virus entry. This work suggests that inhibitors which block TIM-1/virus interaction  
52 may serve as effective antivirals, reducing virus load at late times during EBOV infection.

53

#### 54 *Author summary*

55 T cell immunoglobulin mucin domain-1 (TIM-1) is one of a number of phosphatidylserine (PS)  
56 receptors that mediate clearance of apoptotic bodies by binding PS on the surface of dead or  
57 dying cells. Enveloped viruses mimic apoptotic bodies by exposing PS on the outer leaflet of the  
58 viral membrane. While TIM-1 has been shown to serve as an adherence factor/receptor for  
59 filoviruses in tissue culture, limited studies have investigated the role of TIM-1 as a receptor in  
60 vivo. Here, we sought to determine if TIM-1 was critical for Ebola virus glycoprotein-mediated  
61 infection using a BSL2 model virus. We demonstrate that loss of TIM-1 expression results in  
62 decreased virus load late during infection and significantly reduced virus-elicited mortality.  
63 These findings provide evidence that TIM-1 serves as an important receptor for Ebola virus in  
64 vivo. Blocking TIM-1/EBOV interactions may be effective antiviral strategy to reduce viral load  
65 and pathogenicity at late times of EBOV infection.

66

67 **Introduction**

68 *Zaire ebolavirus* (EBOV) is one of five species of ebolaviruses within the *Filoviridae* family.  
69 EBOV continues to cause significant outbreaks in sub-Saharan Africa with case fatality rates as  
70 high as 90% [1]. All filoviruses have a broad species and cellular tropism. With the exception of  
71 lymphocytes, most cells within the body are thought to support EBOV infection and replication  
72 [2,3]. Histopathological studies of EBOV infected humans and non-human primates (NHPs)  
73 have demonstrated viral antigen in many different organs including: liver, spleen, lymph nodes,  
74 kidney, adrenal glands, lungs, gastrointestinal tract, skin, brain and heart [3-7].

75

76 A number of cell surface receptors are appreciated to mediate filovirus binding and  
77 internalization into the endosomal compartment of cells, including phosphatidylserine (PS)  
78 receptors [8,9] and C-type lectin receptors [10-14]. PS receptors do not interact with the viral  
79 glycoprotein (GP), but bind to PS on the surface of the virion lipid membrane, causing  
80 internalization of viral particles into the endosomal compartment [9,15]. This mechanism of  
81 viral entry has been termed apoptotic mimicry [16]. Following endosomal uptake of filovirions,  
82 proteolytic GP processing occurs, thereby allowing GP to interact with its endosomal cognate  
83 receptor, Niemann Pick C1 [17-21].

84

85 One important family of PS receptors is the T-cell immunoglobulin mucin domain (TIM)  
86 family. TIM family members, encoded by the *Havcr* family of genes, contribute to the uptake  
87 of apoptotic bodies to clear dying cells from tissues and the circulation [22-24]. TIM proteins  
88 are type 1, cell surface glycoproteins. Three family members are present in humans (hTIM-1,  
89 hTIM-3 and hTIM-4) and four in mice (TIM-1, TIM-2, TIM-3 and TIM-4) [25]. hTIM-1 was

90 identified through a bioinformatics-based screen to be important for filovirus entry [8].  
91 Subsequent studies demonstrated that hTIM-1 and hTIM-4, but not hTIM-3, enhance entry of a  
92 broad range of viruses including members of the alphavirus, arenavirus, baculovirus, filovirus,  
93 and flavivirus families [9,15,26-29]. Murine TIM-1 and TIM-4 also enhance enveloped virus  
94 uptake into the endosomal compartment [9,27,29].

95 The molecular interactions between TIM family members and enveloped viruses are well  
96 defined. The amino terminal IgV domain binds to PS on the outer leaflet of the viral membrane  
97 through a IgV domain binding pocket that is conserved across the TIM family of receptors  
98 [9,26,27,29]. Aspartic acid and asparagine residues within the binding pocket are essential for  
99 virion binding [9,15,27]; these same TIM residues are required for apoptotic body binding and  
100 uptake [30]. The IgV domain is extended from the plasma membrane by a mucin like domain  
101 (MLD) that is anchored to the cell surface with by a transmembrane domain connected to a  
102 short intracellular cytoplasmic tail. The length, but not the specific sequence, of the MLD is  
103 required for TIMs to serve as enveloped virus receptors [29]. Surprisingly, neither the TIM  
104 transmembrane domain nor cytoplasmic tail is required as a GPI-anchored TIM-1 construct is  
105 completely functional as a viral receptor [26,29]. These findings indicate that the TIM-1  
106 cytoplasmic tail, which contains a tyrosine phosphorylation site that initiates signaling events  
107 [31-33], is not essential for TIM-1-mediated virus uptake.

108 While it is well established that TIM proteins serve as cell surface receptors for a number of  
109 enveloped viruses during in vitro infection of cultured cells, the importance of these family  
110 members for in vivo filovirus infection and pathogenesis has not been extensively examined.  
111 With the wide variety of cell surface receptors able to mediate filovirus uptake into endosomes,  
112 it is possible that sufficient receptor redundancy exists in vivo, such that the loss of any one of

113 the PS receptors may have little or no effect on EBOV viremia, tissue virus load or pathological  
114 consequence. Alternatively, PS receptors are also immunomodulatory and been implicated in  
115 promoting inflammation. Thus, TIM proteins may exacerbate proinflammatory responses  
116 during virus infection. A recent study demonstrated that TIM-1-deficient mice have lower  
117 morbidity and mortality than wild-type mice when challenged intravascularly (i.v.) with mouse-  
118 adapted EBOV (maEBOV) [34]. This study highlighted the role of TIM-1 in non-permissive T  
119 lymphocytes, reporting that EBOV interaction with TIM-1 on CD4<sup>+</sup> T cells enhanced  
120 proinflammatory cytokine dysregulation. The authors conclude that an enhanced TIM-1-  
121 dependent cytokine storm in T cells significantly contributes to EBOV pathogenesis. However,  
122 the impact of TIM-1 on virus load in mice was only examined in the plasma at a single time  
123 point, leaving open the possibility that TIM-1 may also serve as an important receptor for  
124 EBOV entry in vivo.

125 Here, we examined the in vivo importance of TIM-1 for virus replication and pathogenesis  
126 using a highly tractable BSL2 model virus of EBOV, which consists of recombinant vesicular  
127 stomatitis virus (VSV) encoding EBOV glycoprotein in place of the native VSV G protein  
128 (EBOV GP/rVSV). Our use of the EBOV GP/rVSV model virus allowed us to conduct detailed  
129 studies focused on the role of TIM-1 virus entry, host responses, and pathogenesis. As reported  
130 for maEBOV we observed that EBOV GP/rVSV was less pathogenic in TIM-1-deficient mice  
131 compared to control mice. The impact of the loss of TIM-1 was specific for EBOV GP-  
132 expressing virus since wild-type VSV was equally virulent in TIM-1-deficient and TIM-1-  
133 sufficient mice over a wide range of challenge doses. Importantly, reduced mortality observed  
134 in the virus-infected TIM-1<sup>-/-</sup> mice was associated with lower virus load at late time points  
135 during infection in multiple tissues previously appreciated to be important in EBOV

136 pathogenesis. Consistent with reduced overall virus loads, proinflammatory chemokine profiles  
137 were also lower in the EBOV GP/rVSV infected TIM-1-deficient mice at late time points  
138 following infection. Finally, to directly evaluate whether enhanced survival and reduced  
139 inflammation in TIM-1-deficient mice was associated with T cell activation as previously  
140 reported [34], we depleted T cells in EBOV GP/rVSV infected TIM-1-sufficient or -deficient  
141 mice and found that T cell depletion did not alter EBOV GP/rVSV pathogenesis. In total, our  
142 studies provide evidence that TIM-1 associated pathogenesis correlated with enhanced virus  
143 load at late times during infection, consistent with TIM-1 having an important role as a receptor  
144 for EBOV in vivo.

## 145 ***Materials and Methods***

146

### 147 **Ethics statement**

148 This study was conducted in strict accordance with the Animal Welfare Act and the  
149 recommendations in the Guide for the Care and Use of Laboratory Animals of the National  
150 Institutes of Health (University of Iowa (UI) Institutional Assurance Number: #A3021-01). All  
151 animal procedures were approved by the UI Institutional Animal Care and Use Committee  
152 (IACUC) which oversees the administration of the IACUC protocols and the study was  
153 performed in accordance with the IACUC guidelines (Protocol #8011280, Filovirus  
154 glycoprotein/cellular protein interactions).

### 155 **Mice**

156 BALB/c TIM-1-deficient mice have been previously described [35] and were a kind gift from  
157 Dr. Paul Rothman (Johns Hopkins University). Briefly, exons 4 and 5 of the TIM-1 gene,  
158 *Havcr1*, were replaced with a LacZ gene, generating a TIM-1-null mouse (TIM-1<sup>-/-</sup>) BALB/c  
159 IFN- $\alpha\beta$  receptor-deficient (*Ifnar*<sup>-/-</sup>) mice were a kind gift from Dr. Joan Durbin, NYU Langone

160 Medical Center. Mice were bred at the University of Iowa.

161

162 BALB/c *Ifnar*<sup>-/-</sup> and BALB/c *Havcr1*<sup>-/-</sup> (TIM-1<sup>-/-</sup>) mice were crossed for the creation of  
163 heterozygous progeny. Progeny were interbred and mice screened for the correct BALB/c *Ifnar*<sup>-/-</sup>  
164 *Havcr1*<sup>-/-</sup> genotype (referred to as TIM-1<sup>-/-</sup> throughout this study). All expected genotypes  
165 were produced in normal Mendelian ratios. Genomic DNA from mouse tail-clips was assessed  
166 by PCR for genotypes. The primers and protocol for *Ifnar*<sup>-/-</sup> screening has been previously  
167 described (218). *Havcr1* primer sequences included: shared forward, 5'  
168 GTTTGCTGCCTTATTTGTGTCTGG 3'; WT reverse, 5' CAGACATCA-  
169 ACTCTACAAGGTCCAAGAC 3'; knockout reverse, 5' GTCTGTCCTAGCTTCCTCACTG  
170 3'. PCR amplification was performed for 30 cycles at 94°C for 30 sec, 60°C for 30 sec, and  
171 72°C for 1 min.

172 **Production of full length EBOV GP/rVSV virus and EBOV GPΔO/rVSV which lacked**  
173 **the mucin-like domain**

174

175 These studies used recombinant, replication-competent vesicular stomatitis virus (VSV)  
176 expressing GFP and either full length EBOV GP (EBOV GP/rVSV-GFP) [18] (kind gift of  
177 Dr. Kartik Chandran), EBOV GP lacking the mucin domain of GP1 (EBOV GPΔO/rVSV-  
178 GFP)[8,15] or rVSV-GFP encoding its native glycoprotein, G (G/rVSV) (kind gift of Dr. Sean  
179 Whelan). Virus stocks were produced by infecting Vero cells, an African green monkey kidney  
180 epithelial cell line, at a low multiplicity of infection (MOI) of ~0.001 and collecting  
181 supernatants 48 hours following infection. Virus stocks were concentrated by centrifugation at  
182 7,000 x g at 4°C overnight. The virus pellet was resuspended and centrifuged through a 20%  
183 sucrose cushion by ultracentrifugation at 26,000 rpm for 2 hours at 4°C in a Beckman Coulter  
184 SW32Ti rotor. The pellet was resuspended in PBS, treated with endotoxin removal agent



185 (ThermoScientific #20339), aliquoted, and frozen at -80°C until use.

## 186 **Mouse infections**

187

188 Five- to eight-week-old female BALB/c *Ifnar*<sup>-/-</sup> (control) and BALB/c *Ifnar/Havcr1*<sup>-/-</sup> (TIM-1<sup>-/-</sup>)

189 mice were infected i.v. with recombinant, infectious VSV that encoded GFP and EBOV GP,

190 EBOV ΔO or the native VSV G glycoprotein (EBOV GP/rVSV-GFP, EBOV GPΔO/rVSV-

191 GFP and G/rVSV-GFP, respectively) using concentrations of virus noted in the figure legends.

192 The dose of EBOV GP/rVSV or EBOV GPΔO/rVSV-GFP administered was dependent upon

193 the stock. The dose of each stock was titrated in vivo to give predictable high levels of mortality

194 of control mice in 5-7 days. For studies with G/rVSV-GFP, either 10<sup>1</sup> or 10<sup>5</sup> iu of VSV virus

195 was administered by i.v. injection. Survival was tracked; mice were weighed and scored for

196 sickness daily. Clinical assessment of sickness was scored as follows: 0, no apparent illness; 1,

197 slightly ruffled fur; 2, ruffled fur, active; 3, ruffled fur, inactive; 4, ruffled fur, inactive, hunched

198 posture; 5, moribund or dead. While clinical assessments are not shown in figures, mice were

199 humanely euthanized if they reached a score of 4. All mouse infection studies were concluded

200 at 10 or 12 days following infection due to surviving mice regaining any lost weight and having

201 no signs of clinical illness.

## 202 **Organ viral titers**

203

204 Organs were harvested from control and TIM-1<sup>-/-</sup> mice at 1, 3 or 5 days following infection

205 from with EBOV GPΔO/rVSV. Prior to euthanasia, mice were anesthetized with isoflurane to

206 perform retro-orbital bleeds for serum. Mice were euthanized and perfused with 10 mL of PBS

207 through the heart and organs harvested, weighed and frozen at -80°C. To determine virus titers,

208 organs or sera were thawed and organs were homogenized in PBS and filtered through a 0.45 μ

209 syringe filter. Viral titers were determined by end point dilution on Vero cell as previously

210 described [8]. Infection was scored 5 days following infection for GFP positivity using an  
211 inverted fluorescent microscope. Virus titers were calculated as 50% tissue culture infective  
212 dose (TCID<sub>50</sub>)/mL by the Spearman-Kärber method. All organ titers were normalized  
213 according to the weight of the organ at harvest.

#### 214 **Organ RNA isolation and reverse transcriptase quantitative PCR**

215  
216 Quantitative reverse transcriptase polymerase chain reaction (qRT-PCR) was used to detect  
217 proinflammatory cytokine and chemokines levels from organs of mice challenged with EBOV  
218 GPΔO/rVSV. At time of harvest, organs were placed in Trizol and frozen at -80°C until further  
219 use. Total RNA was isolated using TRIZOL LS reagent (Life Technologies) according  
220 to manufacturer's tissue RNA isolation procedure. RNA was quantified by Nanodrop (Thermo  
221 Scientific). Total RNA (2 μg) was reverse transcribed into cDNA using random primers and the  
222 High-Capacity cDNA Reverse Transcription kit (Applied Biosystems). SYBR Green based  
223 quantitative PCR reactions (Applied Biosystems) were performed using 1.5μL of a 1:100  
224 dilution of cDNA from each reaction and specific primers for murine cytokines and  
225 chemokines. Primer sequences are found in Supplemental Table I. Expression levels of the  
226 cytokine/ chemokines of interest were defined as a ratio between threshold cycle (Ct) values for  
227 the gene of interest and the endogenous control, mouse HPRT, and is displayed as the log<sub>2</sub>  
228 value of this ratio.

#### 229 **T cell depletion studies**

230 Five- to eight-week-old female BALB/c *Ifnar*<sup>-/-</sup> and BALB/c *Ifnar*/TIM-1<sup>-/-</sup> mice were injected  
231 with 200μg of anti-CD4 (clone GK1.5) and 200μg anti-CD8 (clone 2.43) depleting monoclonal  
232 antibodies both one day prior to retroorbital infection with EBOV GP/rVSV-GFP and two days  
233 post infection. Survival was tracked; mice were weighed and scored for sickness daily as

234 described above to assess euthanasia criteria for each infected mouse. Prior to infection with  
235 EBOV GP/rVSV-GFP, depletion was validated by isolating peripheral blood mononuclear cells  
236 from both depleted and non-depleted animals and staining of PBMCs with anti-CD90 antibody  
237 (clone 30-H12). Staining was done by incubating with anti-CD90 antibody in FACS buffer and  
238 Fc block (2.4G2) for 30 minutes, washing 3 times to remove excess antibody, and detecting  
239 fluorescence on a BD FACSCalibur.

## 240 **Statistics**

241 Statistical analyses were performed using GraphPad Prism software (GraphPad Software, Inc.).  
242 Results are shown as means or geometric means and standard error of the means (s.e.m.) or  
243 geometric s.e.m., respectively, is shown where appropriate. Log-rank (Mantel-Cox) tests were  
244 used to analyze differences in survival. In vivo experiments were performed at least in duplicate  
245 with at least 8 mice total per treatment group. Mice or samples were randomly assigned to  
246 various treatment groups. All data points and animals were reported in results and statistical  
247 analyses. For the nonparametric viral titer data, Mann-Whitney U-test was used. *P* values less  
248 than 0.05 were considered significant. For two way comparisons between control and  
249 experimental values, a Student's t-test was performed.

250  
251

## 252 **Results**

### 253 **TIM-1 expression enhances EBOV GP/rVSV infection, but not VSV**

254

255 To create a TIM-1 deficient mouse, exons 4 and 5 of the *Havcr1* gene encoding TIM-1 were  
256 replaced with the LacZ gene by homologous recombination as previously described [35]. This  
257 mouse strain was used to study the role of TIM-1 in allergic airway diseases and Th2 responses  
258 [35]. Phenotypic characterization of TIM-1<sup>-/-</sup> mice revealed no differences in immune cell  
259 numbers, immune system development, or immunological homeostasis compared to WT mice

260 [35]. BALB/c TIM-1<sup>-/-</sup> mice were bred onto a BALB/c interferon αβ receptor (*Ifnar*<sup>-/-</sup>) knock out  
261 background since type I interferon abrogates replication of the BSL2 recombinant EBOV  
262 GP/rVSV used in these studies [36,37]. Homozygous BALB/c *Ifnar*/TIM-1<sup>-/-</sup> and *Ifnar*<sup>-/-</sup> mice  
263 (called TIM-1<sup>-/-</sup> and control mice, respectively, throughout the remainder of this study) were used  
264 for all infections. Challenge virus was administered intravenously since this route of delivery  
265 mimics a primary route of EBOV transmission, blood-to-blood contact. Control and TIM-1<sup>-/-</sup>  
266 mice were challenged with the lowest dose of virus that produced predictable death in control  
267 mice in 5-7 days (Supplemental Fig. 1). Minor titer variations were observed between virus  
268 stocks and dosages were adjusted accordingly.

269  
270 We challenged the TIM-1<sup>-/-</sup> and control mice with full length EBOV GP/rVSV or EBOV  
271 GPΔO/rVSV, which has the GP1 mucin like domain (MLD) deleted. EBOV GPΔO  
272 pseudovirions and recombinant viruses have the same tropism as virus bearing EBOV GP [8,38-  
273 40]. Use of both viruses in these studies allowed us to determine if the elimination of the mucin  
274 domain altered the pathogenesis associated with in vivo challenge with these viruses. As  
275 expected, TIM-1-sufficient control mice succumbed to EBOV GP/rVSV or EBOV GPΔO/rVSV  
276 between days 4-7 of infection (Fig. 1A and B). By contrast, TIM-1<sup>-/-</sup> mice challenged with the  
277 same dose had significantly reduced mortality following EBOV GP/rVSV or EBOV  
278 GPΔO/rVSV infection and delayed time-to-death of those that did succumb to infection. Weight  
279 loss associated with infection in the TIM-1<sup>-/-</sup> mice were also significantly reduced at some days  
280 (data not shown). These findings indicate that TIM-1<sup>-/-</sup> mice had improved survival when  
281 infected with EBOV GP/rVSV compared to controls and that survival was not affected by the  
282 presence of the GP1 MLD.

283

284 In tissue culture studies, we have shown that hTIM-1 does not mediate WT VSV entry [8],  
285 presumably because the cognate receptor for VSV, LDL receptor is abundantly present on target  
286 cells and mediates VSV entry [41]. However, the relevance of TIM-1 in vivo for VSV infection  
287 has not been examined. Further, WT VSV serves as an excellent control for in vivo studies with  
288 EBOV GP/rVSV. We challenged TIM-1<sup>-/-</sup> and control mice with 10<sup>5</sup> iu of VSV by i.v. injection.  
289 In contrast to our EBOV GP/rVSV findings, we observed no difference in the survival curve  
290 between the two strains of mice (Fig. 1C). Since it is likely that VSV bearing its native GP is  
291 more pathogenic than a recombinant VSV containing a different viral GP, we also evaluated  
292 mortality associated with different doses of VSV and found that administration of as little as 10<sup>1</sup>  
293 iu of VSV was lethal to *Ifnar*<sup>-/-</sup> mice (Supplemental Fig. 2). Thus, we repeated VSV infections in  
294 control and TIM-1<sup>-/-</sup> mice at a challenge dose of 10<sup>1</sup> iu to determine if subtle changes in virus  
295 pathogenesis could be discerned. Even at this low dose, there was no difference in the survival in  
296 the TIM-1<sup>-/-</sup> mice versus the control mice (Fig. 1D). These results provide evidence that the  
297 difference in EBOV GP/rVSV pathogenesis in BALB/c *Ifnar*<sup>-/-</sup> and TIM-1<sup>-/-</sup> mice was due to the  
298 presence of EBOV GP expressed in the recombinant VSV rather than other VSV genes. The  
299 reduced pathogenesis of EBOV GP expressing virus in TIM-1<sup>-/-</sup> mice was consistent with  
300 findings described by Younan et al. using maEBOV [34].

301

### 302 **Murine TIM-1 enhances EBOV GP/rVSV virus load at late times during infection**

303

304 The effect of TIM-1 expression on viremia and organ viral loads following i.v. EBOV  
305 GPΔO/rVSV infection was examined in serum and organs harvested 1, 3 or 5 days following  
306 infection (Fig. 2). Viremia and infectious virus in various organs were quantified by endpoint  
307 dilution titering on Vero cells, a highly permissive cell line for EBOV GP/rVSV. At early times

308 during infection, no difference in viremia or virus load was observed in most organs of TIM-1  
309 versus control mice. However, by day 5 of EBOV GPΔO/rVSV infection, TIM-1<sup>-/-</sup> mice had a  
310 100-fold reduction in viremia compared to control mice (Fig. 2) and a similar trend was observed  
311 during infections with full length EBOV GP/rVSV (Supplement Fig. 3). In parallel, levels of  
312 infectious virus in liver, kidney, and adrenal gland were also significantly reduced. Studies at day  
313 5 of infection also indicated that EBOV GPΔO/rVSV loads were much reduced in the brain of  
314 TIM-1<sup>-/-</sup> mice and trended lower in the testis (Supplement Fig. 4A and B), consistent with an  
315 overall reduction in virus load in the TIM-1<sup>-/-</sup> mice at late times during infection. Thus, reduced  
316 virus replication in a number of organs was associated with the survival observed in TIM-1<sup>-/-</sup>  
317 mice. These findings provide evidence that TIM-1 expression is important for the generation of  
318 high viral load in some organs at late times in infection.

319  
320 Viral loads in the spleen and lungs were not affected by the loss of TIM-1 (Fig. 2 and  
321 Supplemental Fig. 4C). The viral burden in the spleen was significantly higher at day 1 than in  
322 any other organ assessed and remained high in both mouse strains throughout the course of  
323 infection with a peak in titers occurring at day 3. These results are consistent with previous  
324 studies that implicate spleen in early and sustained EBOV replication [42-44]. Lung titers were  
325 not significantly different between the control and TIM-1<sup>-/-</sup> mice at 5 days following infection.  
326 This result was somewhat unexpected as we had previously demonstrated robust hTIM-1  
327 expression on the apical surface airway epithelial cells [8]. As TIM-1 was not observed to be  
328 expressed on the basolateral side of lung epithelium, TIM-1 may be important for entry of  
329 aerosolized EBOV entry into a host, but may not influence basolateral infection of lung via the  
330 circulation.

331

332 **TIM-1-expressing mice exhibit elevated levels of specific proinflammatory chemokines**  
333 **following EBOV GP/rVSV infection**

334 Elevated proinflammatory and immunomodulatory cytokines and chemokines are evident in  
335 serum and infected organs during EBOV infection of animal models and patients [45-51]. To  
336 determine if reduced virus load in TIM-1-deficient mice at late time points was associated with  
337 lower RNA expression profiles of selected, well-characterized cytokines, levels in the spleen,  
338 liver and kidney were examined prior to and following EBOV GPΔO/rVSV infection. Organs  
339 were harvested at day 3 and 5 following infection and total RNA was isolated and amplified for  
340 the mRNA of the housekeeping gene, HPRT, and the cytokines IL-6, TNF, IL-12 and IL-10.  
341 Cytokine expression levels were normalized against HPRT expression. Overall, baseline values  
342 of the organ cytokine expression from uninfected control and TIM-1<sup>-/-</sup> mice were low with little  
343 difference between the strains (Fig. 3). While at day 5 TNF was significantly higher in spleen of  
344 control mice, in general during the infection cytokine expression was variable within groups and  
345 levels were not significantly different between the two strains of mice.

346

347 Elevated levels of several chemokines and growth factors have been implicated in fatal EBOV  
348 disease outcomes including MIP-1α, MIP-1β, MCP-1, M-CSF, MIF, IP-10, GRO-α and eotaxin  
349 [49]. Therefore, we analyzed control and TIM-1<sup>-/-</sup> organs following EBOV GPΔO/rVSV  
350 infection for the chemokines, CXCL10 (IP-10) and CCL2 (MCP-1). At least one of the two  
351 chemokine transcripts in all three organs was elevated in the control mice at both day 3 and/or 5  
352 of infection compared to the TIM-1<sup>-/-</sup> mouse tissues (Fig. 4). In combination with our survival  
353 and viral burden results, these observations suggest that the presence of TIM-1 in mice

354 contributes to EBOV GP/rVSV pathogenesis through increased infection of cells in several  
355 organs at late times during infection and that this is associated with increased expression of  
356 proinflammatory chemokines.

357

### 358 **T cell depletion does not alter morbidity associated with EBOV GP/rVSV infection**

359 TIM-1 is expressed by a range of hematopoietic and non-hematopoietic cells [52]. This study  
360 showed that virus load in spleen, an organ rich in hematopoietic cells, was not affected by the  
361 loss of TIM-1 expression, suggesting that it might be TIM-1 expression on non-hematopoietic  
362 cells late during infection that affects EBOV GP/rVSV load and survival. As others have  
363 suggested that TIM-1 on T cell subsets may contribute to enhanced EBOV pathogenesis [34], we  
364 depleted T cells in control and TIM-1<sup>-/-</sup> mice to assess outcomes during EBOV GP/rVSV  
365 infection. Mice were intraperitoneally administered  $\alpha$ -CD8 mAb, 2.43, and  $\alpha$ -CD4 mAb, GK1.5,  
366 at days -1 and 2. We verified that T cells within peripheral blood were profoundly depleted at  
367 day 5 of infection by flow cytometry following immunostaining with an  $\alpha$ -CD90 mAb (Fig. 5A).  
368 As observed for the T cell-competent mice in above studies, T cell-depleted control mice  
369 challenged with EBOV GP/rVSV succumbed to the infection between 4-6 days. Likewise, while  
370 T cell-depleted TIM-1<sup>-/-</sup> mice had significantly better survival than T cell depleted control mice  
371 they did not exhibit improved survival over TIM-1<sup>-/-</sup> mice that were not T cell-depleted (Fig.  
372 5B). These data provide evidence that the presence of T cells does not alter the course of this  
373 acute infection and suggests that TIM-1 expression on non-T cell populations contributes to  
374 pathogenesis.

### 375 ***Discussion***

376 Here, we show that loss of TIM-1 expression decreased overall mortality and delayed time-to-



377 death of those mice that do succumb when challenged with EBOV GP/rVSV. The impact on  
378 survival of TIM-1 expression was similar with rVSV bearing MLD-deleted EBOV GP,  
379 indicating that the presence of the MLD did not affect the observed pathogenesis. Consistent  
380 with the enhanced survival of the TIM-1-deficient mice following virus challenge, we show that  
381 these mice also had reduced infectious virus in liver, kidney and adrenal gland at late times  
382 during infection. EBOV replication in these organs is well established and is thought to  
383 contribute to overall EBOV load [42, 53-55]. The lower virus load in these organs of the TIM-  
384  $1^{-/-}$  mice was also reflected in a ~100-fold reduction in serum viremia at day 5 of infection. The  
385 reduced pathology in our TIM-1-deficient mice was EBOV GP-dependent since survival  
386 associated with G/rVSV infection was unaffected by TIM-1 expression. Thus, our studies  
387 indicate that the glycoprotein present on the virions was responsible for the TIM-1-dependent  
388 changes in virus load and mouse survival.

389

390 Interestingly, we did not observe that all organs previously implicated as important in EBOV  
391 infection had lower virus load in TIM-1 $^{-/-}$  mice. Splenic viral loads were at high throughout  
392 infection in both control and TIM-1 $^{-/-}$  mice. These data suggested that TIM-1 expressing cells  
393 do not appreciably contribute to splenic virus loads and that splenic loads can be high in mice  
394 without those animals necessarily succumbing to infection.

395

396 While the TIM-1 does not interact directly with EBOV GP, the binding of TIM-1 to virion-  
397 associated PS has been shown to elicit viral particle entry into the endosomal compartment  
398 [9,15] where EBOV GP is proteolytically processed, binds to NPC1 and mediates membrane  
399 fusion [17,18,20,21,56-58]. Filoviral particle entry into endosomes occurs through interactions

400 with a number of other cell surface receptors in tissue culture. However, these studies and those  
401 by Younan, et al [34] demonstrate that in vivo at least one receptor, TIM-1, is not redundant  
402 with other receptors, but uniquely contributes to EBOV pathogenesis. Future studies to evaluate  
403 the role of additional host receptors implicated in EBOV entry would provide valuable insights  
404 to the potential receptor redundancy. These receptors include other TIM family members, TAM  
405 tyrosine kinase receptors and C-type lectins.

406

407 The correlation between enhanced survival and reduced viral loads in the TIM-1<sup>-/-</sup> mice  
408 suggests that TIM-1 serves as a virus receptor for EBOV in some organs late during infection.  
409 Likely, late cell targets that express TIM-1 would include kidney epithelial cells [59] and  
410 epithelial cells in other organs [8]. Surprisingly, decreased virus load was not observed in an  
411 earlier study that challenged TIM-1<sup>-/-</sup> mice with maEBOV [34]. Instead, the authors reported  
412 that the genome copy number in plasma did not significantly differ in TIM-1-sufficient and -  
413 deficient mice. However, in this study, virus load was shown from a single time point during  
414 infection. The discrepancy between our findings and the previous study may be due to the  
415 tissues examined and/or the timing of the sampling.

416

417 The physiological role of TIM-1 has been extensively studied. Agonistic monoclonal antibody  
418 binding to TIM-1 on CD4<sup>+</sup> T, iNKT and splenic B cells induces cellular activation in a wide  
419 range of organisms from zebrafish to humans [24,32,33,59-61]. This observation has led to the  
420 understanding that TIM-1 serves as a costimulatory molecule on these cells and leads to  
421 upregulation of cytokines in T and iNKT cells [24,59], as well as antibody production by B  
422 cells [61]. In contrast, transient TIM-1 expression on injured kidney epithelial cells serves an

423 anti-inflammatory role through its uptake and clearance of apoptotic bodies [62].

424

425 Younan, et al. described the role of TIM-1 in EBOV pathology to TIM-1 stimulation of T cell  
426 cytokine and chemokine dysregulation [34]. Yet proinflammatory cytokines were only  
427 modestly altered in our studies even at late times during infection in TIM-1-sufficient mice. We  
428 did observe elevated levels of the proinflammatory chemokines, CCL2 and CXCL10, in the  
429 TIM-1-sufficient mice compared to the deficient mice and postulated that the higher levels of  
430 chemokines in TIM-1<sup>+</sup> mice may reflect the innate immune responses stimulated by the higher  
431 virus load. Alternatively, as postulated by Younan, et al., the elevated chemokine profile and  
432 associated mortality in the TIM-1<sup>+</sup> mice might be due to a TIM-1-dependent cytokine storm  
433 elicited by T cells [34]. We tested this latter possibility by virus challenge of T cell-depleted  
434 mice. T cell depletion did not alter EBOV GP/rVSV pathology. Significantly greater mortality  
435 was associated with virus infection of TIM-1-sufficient mice which were depleted for T cells  
436 than T cell-depleted, TIM-1-deficient mice, suggesting that T cells are not responsible for the  
437 reduced survival of TIM-1-sufficient mice. Hence, our findings do not support the conclusion  
438 that TIM-1 expression on T cells plays a significant role in the pathology associated with this  
439 acute infection.

440

441 Our studies and studies performed by Younan et al. [34] delivered EBOV GP/rVSV  
442 intravenously. In studies not shown, we observed that intraperitoneal (i.p.) delivery of EBOV  
443 GP/rVSV or maEBOV into WT versus TIM-1<sup>-/-</sup> mice was equally pathogenic. This finding may  
444 be explained by the previous observation that another TIM family member, TIM-4, is highly  
445 expressed on resident peritoneal macrophages [63] and is used as a receptor for EBOV [27].

446 Likely, the use of TIM-4 as a receptor within this compartment usurps the need for TIM-1  
447 expression during i.p. challenge, even late during infection.

448

449 Our results also demonstrate that TIM-1 is not important for WT VSV pathogenesis. Due to the  
450 wide cellular tropism of VSV, ubiquitous cell lipid components like PS, phosphatidylinositol or  
451 the ganglioside GM3 were originally proposed as the VSV cell surface receptor [64-66].  
452 However, more recent investigations have revealed that these lipids are not readily used as VSV  
453 cell surface receptors [67,68]. Instead, the LDL receptor and its family members are proposed  
454 to serve as VSV receptors on human and mouse cells [41]. Therefore, in vivo pathogenesis  
455 induced by VSV would differ from EBOV GP/rVSV since the dependence on LDL receptors  
456 for entry is conferred by the VSV G glycoprotein [41]. Presumably the VSV membrane  
457 contains PS that can interact with TIM-1, but the affinity of VSV G for LDL receptors is likely  
458 greater than the affinity of PS in the virion envelope towards PS receptors like TIM-1. Studies  
459 from our lab have shown that only when the high affinity interactions of Lassa virus GP with its  
460 receptor,  $\alpha$ -dystroglycan, are abrogated does TIM-1 mediate Lassa virus pseudovirion entry  
461 [69]. Future studies would be valuable to assess the ability of VSV to utilize TIM-1 as a cell  
462 surface receptor in the absence of expression of LDL receptors.

463

464 Liver and kidney dysfunction and necrosis are integral aspects of EBOV pathology of humans,  
465 NHPs [3,70] and mice [71,72]. Our studies indicate that TIM-1 expression is associated with  
466 elevated viral loads in the liver, kidney, adrenal gland, and brain since loss of TIM-1  
467 significantly lowered viral burden in these organs. Future studies will need to explore the  
468 impact that TIM-1 expression has on EBOV infection of specific cells within these organs. By

469 identifying TIM-1 expressing cells that serve as viral targets and understanding the contribution  
470 of these cells to the EBOV disease pathogenesis, we will be able to better develop TIM-1  
471 specific therapeutics against EBOV infection.

472

473 **Acknowledgements:** We would like to thank Drs. Al Klingelutz and Patrick Sinn for their  
474 helpful comments on the manuscript.

475

#### 476 **Literature cited**

477

- 478 1. Feldmann H, Geisbert TW (2011) Ebola haemorrhagic fever. *Lancet* 377: 849-862.
- 479 2. Geisbert TW, Hensley LE, Gibb TR, Steele KE, Jaax NK, et al. (2000) Apoptosis induced in  
480 vitro and in vivo during infection by Ebola and Marburg viruses. *Lab Invest* 80: 171-186.
- 481 3. Martines RB, Ng DL, Greer PW, Rollin PE, Zaki SR (2015) Tissue and cellular tropism,  
482 pathology and pathogenesis of Ebola and Marburg viruses. *J Pathol* 235: 153-174.
- 483 4. Zaki SR, Goldsmith CS (1999) Pathologic features of filovirus infections in humans. *Curr Top*  
484 *Microbiol Immunol* 235: 97-116.
- 485 5. Zaki SR, Shieh WJ, Greer PW, Goldsmith CS, Ferebee T, et al. (1999) A novel  
486 immunohistochemical assay for the detection of Ebola virus in skin: implications for  
487 diagnosis, spread, and surveillance of Ebola hemorrhagic fever. *Commission de Lutte*  
488 *contre les Epidemies a Kikwit. J Infect Dis* 179 Suppl 1: S36-47.
- 489 6. Geisbert TW, Hensley LE, Larsen T, Young HA, Reed DS, et al. (2003) Pathogenesis of  
490 Ebola hemorrhagic fever in cynomolgus macaques: evidence that dendritic cells are early  
491 and sustained targets of infection. *Am J Pathol* 163: 2347-2370.
- 492 7. Geisbert TW, Young HA, Jahrling PB, Davis KJ, Larsen T, et al. (2003) Pathogenesis of  
493 Ebola hemorrhagic fever in primate models: evidence that hemorrhage is not a direct  
494 effect of virus-induced cytolysis of endothelial cells. *Am J Pathol* 163: 2371-2382.
- 495 8. Kondratowicz AS, Lennemann NJ, Sinn PL, Davey RA, Hunt CL, et al. (2011) T-cell  
496 immunoglobulin and mucin domain 1 (TIM-1) is a receptor for Zaire Ebolavirus and  
497 Lake Victoria Marburgvirus. *Proc Natl Acad Sci U S A* 108: 8426-8431.
- 498 9. Jemielity S, Wang JJ, Chan YK, Ahmed AA, Li W, et al. (2013) TIM-family proteins promote  
499 infection of multiple enveloped viruses through virion-associated phosphatidylserine.  
500 *PLoS Pathog* 9: e1003232.
- 501 10. Alvarez CP, Lasala F, Carrillo J, Muniz O, Corbi AL, et al. (2002) C-type lectins DC-SIGN  
502 and L-SIGN mediate cellular entry by Ebola virus in cis and in trans. *J Virol* 76: 6841-  
503 6844.
- 504 11. Simmons G, Reeves JD, Grogan CC, Vandenberghe LH, Baribaud F, et al. (2003) DC-SIGN  
505 and DC-SIGNR bind ebola glycoproteins and enhance infection of macrophages and  
506 endothelial cells. *Virology* 305: 115-123.
- 507 12. Takada A, Fujioka K, Tsuji M, Morikawa A, Higashi N, et al. (2004) Human macrophage

- 508 C-type lectin specific for galactose and N-acetylgalactosamine promotes filovirus entry. *J*  
509 *Virol* 78: 2943-2947.
- 510 13. Marzi A, Gramberg T, Simmons G, Moller P, Rennekamp AJ, et al. (2004) DC-SIGN and  
511 DC-SIGNR interact with the glycoprotein of Marburg virus and the S protein of severe  
512 acute respiratory syndrome coronavirus. *J Virol* 78: 12090-12095.
- 513 14. Powlesland AS, Fisch T, Taylor ME, Smith DF, Tissot B, et al. (2008) A novel mechanism  
514 for LSEctin binding to Ebola virus surface glycoprotein through truncated glycans. *J*  
515 *Biol Chem* 283: 593-602.
- 516 15. Moller-Tank S, Kondratowicz AS, Davey RA, Rennert PD, Maury W (2013) Role of the  
517 phosphatidylserine receptor TIM-1 in enveloped-virus entry. *J Virol* 87: 8327-8341.
- 518 16. Mercer J, Helenius A (2008) Vaccinia virus uses macropinocytosis and apoptotic mimicry to  
519 enter host cells. *Science* 320: 531-535.
- 520 17. Chandran K, Sullivan NJ, Felbor U, Whelan SP, Cunningham JM (2005) Endosomal  
521 proteolysis of the Ebola virus glycoprotein is necessary for infection. *Science* 308: 1643-  
522 1645.
- 523 18. Carette JE, Raaben M, Wong AC, Herbert AS, Obernosterer G, et al. (2011) Ebola virus  
524 entry requires the cholesterol transporter Niemann-Pick C1. *Nature* 477: 340-343.
- 525 19. Miller EH, Harrison JS, Radoshitzky SR, Higgins CD, Chi X, et al. (2011) Inhibition of  
526 Ebola virus entry by a C-peptide targeted to endosomes. *The Journal of biological*  
527 *chemistry* 286: 15854-15861.
- 528 20. Cote M, Misasi J, Ren T, Bruchez A, Lee K, et al. (2011) Small molecule inhibitors reveal  
529 Niemann-Pick C1 is essential for Ebola virus infection. *Nature* 477: 344-348.
- 530 21. Schornberg K, Matsuyama S, Kabsch K, Delos S, Bouton A, et al. (2006) Role of endosomal  
531 cathepsins in entry mediated by the Ebola virus glycoprotein. *J Virol* 80: 4174-4178.
- 532 22. Kobayashi N, Karisola P, Pena-Cruz V, Dorfman DM, Jinushi M, et al. (2007) TIM-1 and  
533 TIM-4 glycoproteins bind phosphatidylserine and mediate uptake of apoptotic cells.  
534 *Immunity* 27: 927-940.
- 535 23. Ichimura T, Asseldonk EJ, Humphreys BD, Gunaratnam L, Duffield JS, et al. (2008) Kidney  
536 injury molecule-1 is a phosphatidylserine receptor that confers a phagocytic phenotype  
537 on epithelial cells. *J Clin Invest* 118: 1657-1668.
- 538 24. Lee HH, Meyer EH, Goya S, Pichavant M, Kim HY, et al. (2010) Apoptotic cells activate  
539 NKT cells through T cell Ig-like mucin-like-1 resulting in airway hyperreactivity. *J*  
540 *Immunol* 185: 5225-5235.
- 541 25. Kuchroo VK, Umetsu DT, DeKruyff RH, Freeman GJ (2003) The TIM gene family:  
542 emerging roles in immunity and disease. *Nat Rev Immunol* 3: 454-462.
- 543 26. Meertens L, Carnec X, Lecoin MP, Ramdasi R, Guivel-Benhassine F, et al. (2012) The TIM  
544 and TAM Families of Phosphatidylserine Receptors Mediate Dengue Virus Entry. *Cell*  
545 *host & microbe* 12: 544-557.
- 546 27. Rhein BA, Brouillette RB, Schaack GA, Chiorini JA, Maury W (2016) Characterization of  
547 Human and Murine T-Cell Immunoglobulin Mucin Domain 4 (TIM-4) IgV Domain  
548 Residues Critical for Ebola Virus Entry. *J Virol* 90: 6097-6111.
- 549 28. Morizono K, Chen IS (2014) Role of phosphatidylserine receptors in enveloped virus  
550 infection. *J Virol* 88: 4275-4290.
- 551 29. Moller-Tank S, Albritton LM, Rennert PD, Maury W (2014) Characterizing Functional  
552 Domains for TIM-Mediated Enveloped Virus Entry. *J Virol* 88: 6702-6713.
- 553 30. Santiago C, Ballesteros A, Martinez-Munoz L, Mellado M, Kaplan GG, et al. (2007)

- 554 Structures of T cell immunoglobulin mucin protein 4 show a metal-Ion-dependent ligand  
555 binding site where phosphatidylserine binds. *Immunity* 27: 941-951.
- 556 31. Binne LL, Scott ML, Rennert PD (2007) Human TIM-1 associates with the TCR complex  
557 and up-regulates T cell activation signals. *J Immunol* 178: 4342-4350.
- 558 32. de Souza AJ, Oak JS, Jordanhazy R, DeKruyff RH, Fruman DA, et al. (2008) T cell Ig and  
559 mucin domain-1-mediated T cell activation requires recruitment and activation of  
560 phosphoinositide 3-kinase. *J Immunol* 180: 6518-6526.
- 561 33. de Souza AJ, Oriss TB, O'Malley K J, Ray A, Kane LP (2005) T cell Ig and mucin 1 (TIM-1)  
562 is expressed on in vivo-activated T cells and provides a costimulatory signal for T cell  
563 activation. *Proc Natl Acad Sci U S A* 102: 17113-17118.
- 564 34. Younan P, Iampietro M, Nishida A, Ramanathan P, Santos RI, et al. (2017) Ebola Virus  
565 Binding to Tim-1 on T Lymphocytes Induces a Cytokine Storm. *MBio* 8.
- 566 35. Curtiss ML, Gorman JV, Businga TR, Traver G, Singh M, et al. (2012) Tim-1 regulates Th2  
567 responses in an airway hypersensitivity model. *Eur J Immunol* 42: 651-661.
- 568 36. Youngner JS, Thacore HR, Kelly ME (1972) Sensitivity of ribonucleic acid and  
569 deoxyribonucleic acid viruses to different species of interferon in cell cultures. *J Virol* 10:  
570 171-178.
- 571 37. Stewart WE, 2nd, Scott WD, Sulkin SE (1969) Relative sensitivities of viruses to different  
572 species of interferon. *J Virol* 4: 147-153.
- 573 38. Jeffers SA, Sanders DA, Sanchez A (2002) Covalent modifications of the ebola virus  
574 glycoprotein. *J Virol* 76: 12463-12472.
- 575 39. Yang Z, Delgado R, Xu L, Todd RF, Nabel EG, et al. (1998) Distinct cellular interactions of  
576 secreted and transmembrane Ebola virus glycoproteins. *Science* 279: 1034-1037.
- 577 40. Manicassamy B, Wang J, Jiang H, Rong L (2005) Comprehensive analysis of ebola virus  
578 GP1 in viral entry. *J Virol* 79: 4793-4805.
- 579 41. Finkelshtein D, Werman A, Novick D, Barak S, Rubinstein M (2013) LDL receptor and its  
580 family members serve as the cellular receptors for vesicular stomatitis virus. *Proc Natl*  
581 *Acad Sci U S A* 110: 7306-7311.
- 582 42. Wyers M, Formenty P, Cherel Y, Guigand L, Fernandez B, et al. (1999) Histopathological  
583 and immunohistochemical studies of lesions associated with Ebola virus in a naturally  
584 infected chimpanzee. *The Journal of infectious diseases* 179 Suppl 1: S54-59.
- 585 43. Bray M, Davis K, Geisbert T, Schmaljohn C, Huggins J (1998) A mouse model for  
586 evaluation of prophylaxis and therapy of Ebola hemorrhagic fever. *J Infect Dis* 178: 651-  
587 661.
- 588 44. Gibb TR, Bray M, Geisbert TW, Steele KE, Kell WM, et al. (2001) Pathogenesis of  
589 experimental Ebola Zaire virus infection in BALB/c mice. *J Comp Pathol* 125: 233-242.
- 590 45. Hensley LE, Young HA, Jahrling PB, Geisbert TW (2002) Proinflammatory response during  
591 Ebola virus infection of primate models: possible involvement of the tumor necrosis  
592 factor receptor superfamily. *Immunol Lett* 80: 169-179.
- 593 46. Sanchez A, Lukwiya M, Bausch D, Mahanty S, Sanchez AJ, et al. (2004) Analysis of human  
594 peripheral blood samples from fatal and nonfatal cases of Ebola (Sudan) hemorrhagic  
595 fever: cellular responses, virus load, and nitric oxide levels. *J Virol* 78: 10370-10377.
- 596 47. Rubins KH, Hensley LE, Wahl-Jensen V, Daddario DiCaprio KM, Young HA, et al. (2007)  
597 The temporal program of peripheral blood gene expression in the response of nonhuman  
598 primates to Ebola hemorrhagic fever. *Genome Biol* 8: R174.
- 599 48. Hutchinson KL, Rollin PE (2007) Cytokine and chemokine expression in humans infected

- 600 with Sudan Ebola virus. *The Journal of infectious diseases* 196 Suppl 2: S357-363.
- 601 49. Wauquier N, Becquart P, Padilla C, Baize S, Leroy EM (2010) Human fatal zaire ebola virus  
602 infection is associated with an aberrant innate immunity and with massive lymphocyte  
603 apoptosis. *PLoS Negl Trop Dis* 4.
- 604 50. Martins K, Cooper C, Warren T, Wells J, Bell T, et al. (2015) Characterization of clinical and  
605 immunological parameters during Ebola virus infection of rhesus macaques. *Viral*  
606 *Immunol* 28: 32-41.
- 607 51. Cross RW, Fenton KA, Geisbert JB, Mire CE, Geisbert TW (2015) Modeling the Disease  
608 Course of Zaire ebolavirus Infection in the Outbred Guinea Pig. *J Infect Dis* 212 Suppl 2:  
609 S305-315.
- 610 52. Kim HY, Chang YJ, Chuang YT, Lee HH, Kasahara DI, et al. (2013) T-cell immunoglobulin  
611 and mucin domain 1 deficiency eliminates airway hyperreactivity triggered by the  
612 recognition of airway cell death. *J Allergy Clin Immunol* 132: 414-425 e416.
- 613 53. Ryabchikova EI, Kolesnikova LV, Luchko SV (1999) An analysis of features of  
614 pathogenesis in two animal models of Ebola virus infection. *The Journal of infectious*  
615 *diseases* 179 Suppl 1: S199-202.
- 616 54. Davis KJ, Anderson AO, Geisbert TW, Steele KE, Geisbert JB, et al. (1997) Pathology of  
617 experimental Ebola virus infection in African green monkeys. Involvement of fibroblastic  
618 reticular cells. *Arch Pathol Lab Med* 121: 805-819.
- 619 55. Bird BH, Spengler JR, Chakrabarti AK, Khristova ML, Sealy TK, et al. (2016) Humanized  
620 Mouse Model of Ebola Virus Disease Mimics the Immune Responses in Human Disease.  
621 *J Infect Dis* 213: 703-711.
- 622 56. Miller EH, Obernosterer G, Raaben M, Herbert AS, Deffieu MS, et al. (2012) Ebola virus  
623 entry requires the host-programmed recognition of an intracellular receptor. *The EMBO*  
624 *journal* 31: 1947-1960.
- 625 57. Brecher M, Schornberg KL, Delos SE, Fusco ML, Sapphire EO, et al. (2012) Cathepsin  
626 cleavage potentiates the Ebola virus glycoprotein to undergo a subsequent fusion-relevant  
627 conformational change. *Journal of virology* 86: 364-372.
- 628 58. Gregory SM, Larsson P, Nelson EA, Kasson PM, White JM, et al. (2014) Ebolavirus entry  
629 requires a compact hydrophobic fist at the tip of the fusion loop. *J Virol* 88: 6636-6649.
- 630 59. Umetsu SE, Lee W-L, McIntire JJ, Downey L, Sanjanwala B, et al. (2005) TIM-1 induces T  
631 cell activation and inhibits the development of peripheral tolerance. *Nat Immunol* 6: 447-  
632 454.
- 633 60. Xu XG, Hu JF, Ma JX, Nie L, Shao T, et al. (2016) Essential Roles of TIM-1 and TIM-4  
634 Homologs in Adaptive Humoral Immunity in a Zebrafish Model. *J Immunol* 196: 1686-  
635 1699.
- 636 61. Ma J, Usui Y, Takeda K, Harada N, Yagita H, et al. (2011) TIM-1 signaling in B cells  
637 regulates antibody production. *Biochem Biophys Res Commun* 406: 223-228.
- 638 62. Yang L, Brooks CR, Xiao S, Sabbisetti V, Yeung MY, et al. (2015) KIM-1-mediated  
639 phagocytosis reduces acute injury to the kidney. *J Clin Invest* 125: 1620-1636.
- 640 63. Miyanishi M, Tada K, Koike M, Uchiyama Y, Kitamura T, et al. (2007) Identification of  
641 Tim4 as a phosphatidylserine receptor. *Nature* 450: 435-439.
- 642 64. Schlegel R, Tralka TS, Willingham MC, Pastan I (1983) Inhibition of VSV binding and  
643 infectivity by phosphatidylserine: is phosphatidylserine a VSV-binding site? *Cell* 32:  
644 639-646.
- 645 65. Superti F, Girmenta C, Seganti L, Orsi N (1986) Role of sialic acid in cell receptors for



- 646 vesicular stomatitis virus. *Acta Virol* 30: 10-18.
- 647 66. Mastromarino P, Conti C, Goldoni P, Hauttecoeur B, Orsi N (1987) Characterization of  
648 membrane components of the erythrocyte involved in vesicular stomatitis virus  
649 attachment and fusion at acidic pH. *J Gen Virol* 68 ( Pt 9): 2359-2369.
- 650 67. Coil DA, Miller AD (2004) Phosphatidylserine is not the cell surface receptor for vesicular  
651 stomatitis virus. *J Virol* 78: 10920-10926.
- 652 68. Bloor S, Maelfait J, Krumbach R, Beyaert R, Randow F (2010) Endoplasmic reticulum  
653 chaperone gp96 is essential for infection with vesicular stomatitis virus. *Proc Natl Acad*  
654 *Sci U S A* 107: 6970-6975.
- 655 69. Brouillette RB, Phillips EK, Patel R, Mahauad-Fernandez W, Moller-Tank S, et al. (2018)  
656 TIM-1 Mediates Dystroglycan-Independent Entry of Lassa Virus. *J Virol* 92.
- 657 70. Paessler S, Walker DH (2013) Pathogenesis of the viral hemorrhagic fevers. *Annu Rev*  
658 *Pathol* 8: 411-440.
- 659 71. Bradfute SB, Warfield KL, Bray M (2012) Mouse models for filovirus infections. *Viruses* 4:  
660 1477-1508.
- 661 72. Raymond J, Bradfute S, Bray M (2011) Filovirus infection of STAT-1 knockout mice. *J*  
662 *Infect Dis* 204 Suppl 3: S986-990.

663  
664  
665

#### Figure legends

666 **Fig. 1. Loss of TIM-1 reduces mortality following EBOV GP/rVSV and EBOV GP**

667  **$\Delta$ O/rVSV infection, but not G/rVSV.**

668 A and B. Female BALB/c *Ifnar*<sup>-/-</sup> (control) and BALB/c *Ifnar*<sup>-/-</sup>/TIM-1<sup>-/-</sup> (TIM-1<sup>-/-</sup>) mice infected  
669 with 10<sup>5</sup> iu EBOV GP/rVSV (A; n = 5 mice per group) or EBOV GP  $\Delta$ O/rVSV (B; n = 13-17  
670 mice per group) by intravenous injection. C. Female BALB/c *Ifnar*<sup>-/-</sup> (control) and BALB/c  
671 *Ifnar*<sup>-/-</sup>/TIM-1<sup>-/-</sup> (TIM-1<sup>-/-</sup>) mice infected with 10<sup>5</sup> iu G/rVSV ( n = 10 mice per group). D. Similar  
672 G/rVSV challenge studies as shown in panel C, but mice were challenged with 10<sup>1</sup> iu (n = 5 mice  
673 per group) of G/rVSV. Survival was assessed following infection for all mouse studies.

674 Significance for survival curve was determined by Log Rank (Mantel-Cox) test, \* p< 0.05, \*\*p <  
675 0.01. LT50 = median lethal time until death; NC = noncalculable.

676

677 **Fig. 2. Reduced viremia and viral loads in a variety of organs of TIM-1<sup>-/-</sup> mice at late time**  
678 **points following i.v. EBOV GP ΔO/rVSV infection.**

679 Sera and organs were harvested from BALB/c *Ifnar*<sup>-/-</sup> (control) and BALB/c *Ifnar*/TIM-1<sup>-/-</sup>  
680 (TIM-1<sup>-/-</sup>) mice at days 1, 3 and 5 following infection with 10<sup>5</sup> iu of EBOV GP ΔO /rVSV by i.v.  
681 injection. Titers were determined by endpoint dilution of serum or homogenized organ samples  
682 on Vero cells. Solid lines indicate geometric mean for each data set. Dotted line indicates the  
683 level of detection. Adrenal gland (AG) titers are displayed as per AG homogenized in 1 ml of  
684 PBS. Significance was calculated by Mann-Whitney test to compare control to TIM-1<sup>-/-</sup> mice at  
685 each time point, \**p* < 0.05, \*\**p* < 0.01. ns, not significant.

686

687 **Fig. 3. Cytokine expression in liver, spleen and kidney of EBOV GPΔO/rVSV-infected**  
688 ***Ifnar*<sup>-/-</sup> and *Ifnar*/TIM-1<sup>-/-</sup> mice.**

689 Tissues were harvested from uninfected and infected BALB/c *Ifnar*<sup>-/-</sup> (control) and BALB/c  
690 *Ifnar* /TIM-1<sup>-/-</sup> (TIM-1<sup>-/-</sup>) mice. For infection studies, tissues were harvested at 3 or 5 days  
691 following infection with 10<sup>5</sup> iu of EBOV GPΔO/rVSV by i.v. injection. RNA was isolated from  
692 the organs and expression of mouse TNF, IL-6, IL-10 and IL-12, were quantified by qRT-PCR.  
693 Results represent cytokines expression relative to murine HPRT for at least three independent  
694 livers, spleens and kidneys. Data points represent values for individual mice. Solid lines indicate  
695 the mean for each data set. Statistical significance was determined by Student's t-test compared  
696 the control mice for each time point and is only shown for those comparisons observed to differ,  
697 \**p*<0.05.

698

699 **Fig. 4. Chemokine CXCL10 and CCL2 expression in the liver, spleen and kidney of EBOV**

700 **GPΔO/rVSV-infected control and TIM-1<sup>-/-</sup> mice.**

701 Tissues were harvested from uninfected and infected BALB/c *Ifnar*<sup>-/-</sup> (control) and BALB/c  
702 *Ifnar*<sup>-/-</sup>/TIM-1<sup>-/-</sup> (TIM-1<sup>-/-</sup>) mice. For infection studies, tissues were harvested at 3 or 5 days  
703 following infection with 10<sup>5</sup> iu of EBOV GPΔO/rVSV by i.v. injection. RNA was isolated from  
704 the organs and proinflammatory chemokines, mouse CXCL10 and CCL2, were quantified by  
705 qRT-PCR. Results represent chemokine expression relative to murine HPRT for at least three  
706 independent livers, spleens and kidneys. Data points represent values for individual mice. Solid  
707 lines indicate the mean for each data set. Statistical significance was determined by Student's t-  
708 test compared the control mice for each time point and is only shown for those comparisons  
709 observed to differ, \*p<0.05.

710

711 **Fig. 5. T cell depletion does not alter the survival protection conferred by the loss of TIM-1**

712 **expression.**

713 A. Intraperitoneal injection of α-CD8 mAb, clone 2.43, and α-CD4 mAb, clone GK1.5, treatment  
714 at days -1 and 2 systemically depletes T cell populations in Female BALB/c *Ifnar*<sup>-/-</sup> (Control) and  
715 BALB/c *Ifnar*<sup>-/-</sup>/TIM-1<sup>-/-</sup> (TIM-1<sup>-/-</sup>) mice as determined by α-CD90 mAb staining of peripheral  
716 blood mononuclear cells at day 5 following EBOV GP/rVSV infection. CD90.2 overlay depicts  
717 the subset of cells gated in the panel on the left.

718 B. Survival was assessed following infection with 7x10<sup>2</sup> iu of EBOV GP/rVSV administered by  
719 intravenous infection (n = 10 mice per group) and two treatments of α-CD8 mAb and α-CD4  
720 mAb at Day -1 and 2 from infection. Significance for survival curve was determined by Log  
721 Rank (Mantel-Cox) test, \*\*\*p < 0.001.

722

723 **Supplemental data**

724 **Supplemental Table 1. Cytokine/Chemokine primer sequences for qRT-PCR analysis.**

725 **Supplemental Fig. 1.** Mortality (A, C) and weight loss (B, D) associated with increasing doses  
726 of EBOV GPΔO/rVSV (A,B) and EBOV GP/rVSV (C,D). All virus was administered iv. n=1-3  
727 mice per group.

728

729 **Supplemental Fig.2. Weight loss following intraperitoneal infection of *Ifnar*<sup>-/-</sup> mice with 10-**

730 **fold serial dilutions of VSV.** BALB/c *Ifnar*<sup>-/-</sup> mice (1-4 mice per dose) received the indicated  
731 dose of EBOVΔO GP/rVSV virus by i.p. injection. Weight loss was tracked over 10-days to  
732 determine the lowest predictably lethal dose ( $10^1$  infectious units). Grey lines indicate the virus  
733 doses that caused mortality in all or some of the mice over the course of the experiment with  
734 100% of mice succumbing to the  $10^1$  iu dose.

735

736 **Supplemental Fig. 3. EBOV/rVSV serum titers.** Sera were harvested from BALB/c *Ifnar*<sup>-/-</sup>

737 (control) or BALB/c *Ifnar*<sup>-/-</sup> /TIM-1<sup>-/-</sup> (TIM-1<sup>-/-</sup>) mice at days 1, 3 and 5 following infection with  
738  $10^5$  iu of EBOV GP/rVSV by i.v. injection. Titers were determined by endpoint dilution of serum  
739 on Vero cells. Solid lines indicate geometric mean for each data set. Dotted line indicates the  
740 level of detection. Significance was calculated by Student's t-tests comparisons of the geometric  
741 means.

742

743 **Supplemental Fig. 4. Reduced viral loads in the brain but not lungs of *Ifnar*<sup>-/-</sup>/*TIM-1*<sup>-/-</sup> mice**

744 **5 days following i.v. EBOV GP  $\Delta$ O /rVSV infection.**

745 Brain (A), testis (B) and lung (C) tissue were harvested from BALB/c *Ifnar*<sup>-/-</sup> (control) to

746 BALB/c *Ifnar*<sup>-/-</sup>/*TIM-1*<sup>-/-</sup> (*TIM-1*<sup>-/-</sup>) mice at day 5 following infection with 10<sup>5</sup> iu of EBOV GP

747  $\Delta$ O /rVSV by i.v. injection. Titers were determined by endpoint dilution of homogenized organ

748 samples on Vero cells. Shown are data points for individual mice within each treatment and the

749 bold line represent the mean titers from serum of of 2-4 mice per group.

750

751

752

753

754

755

756

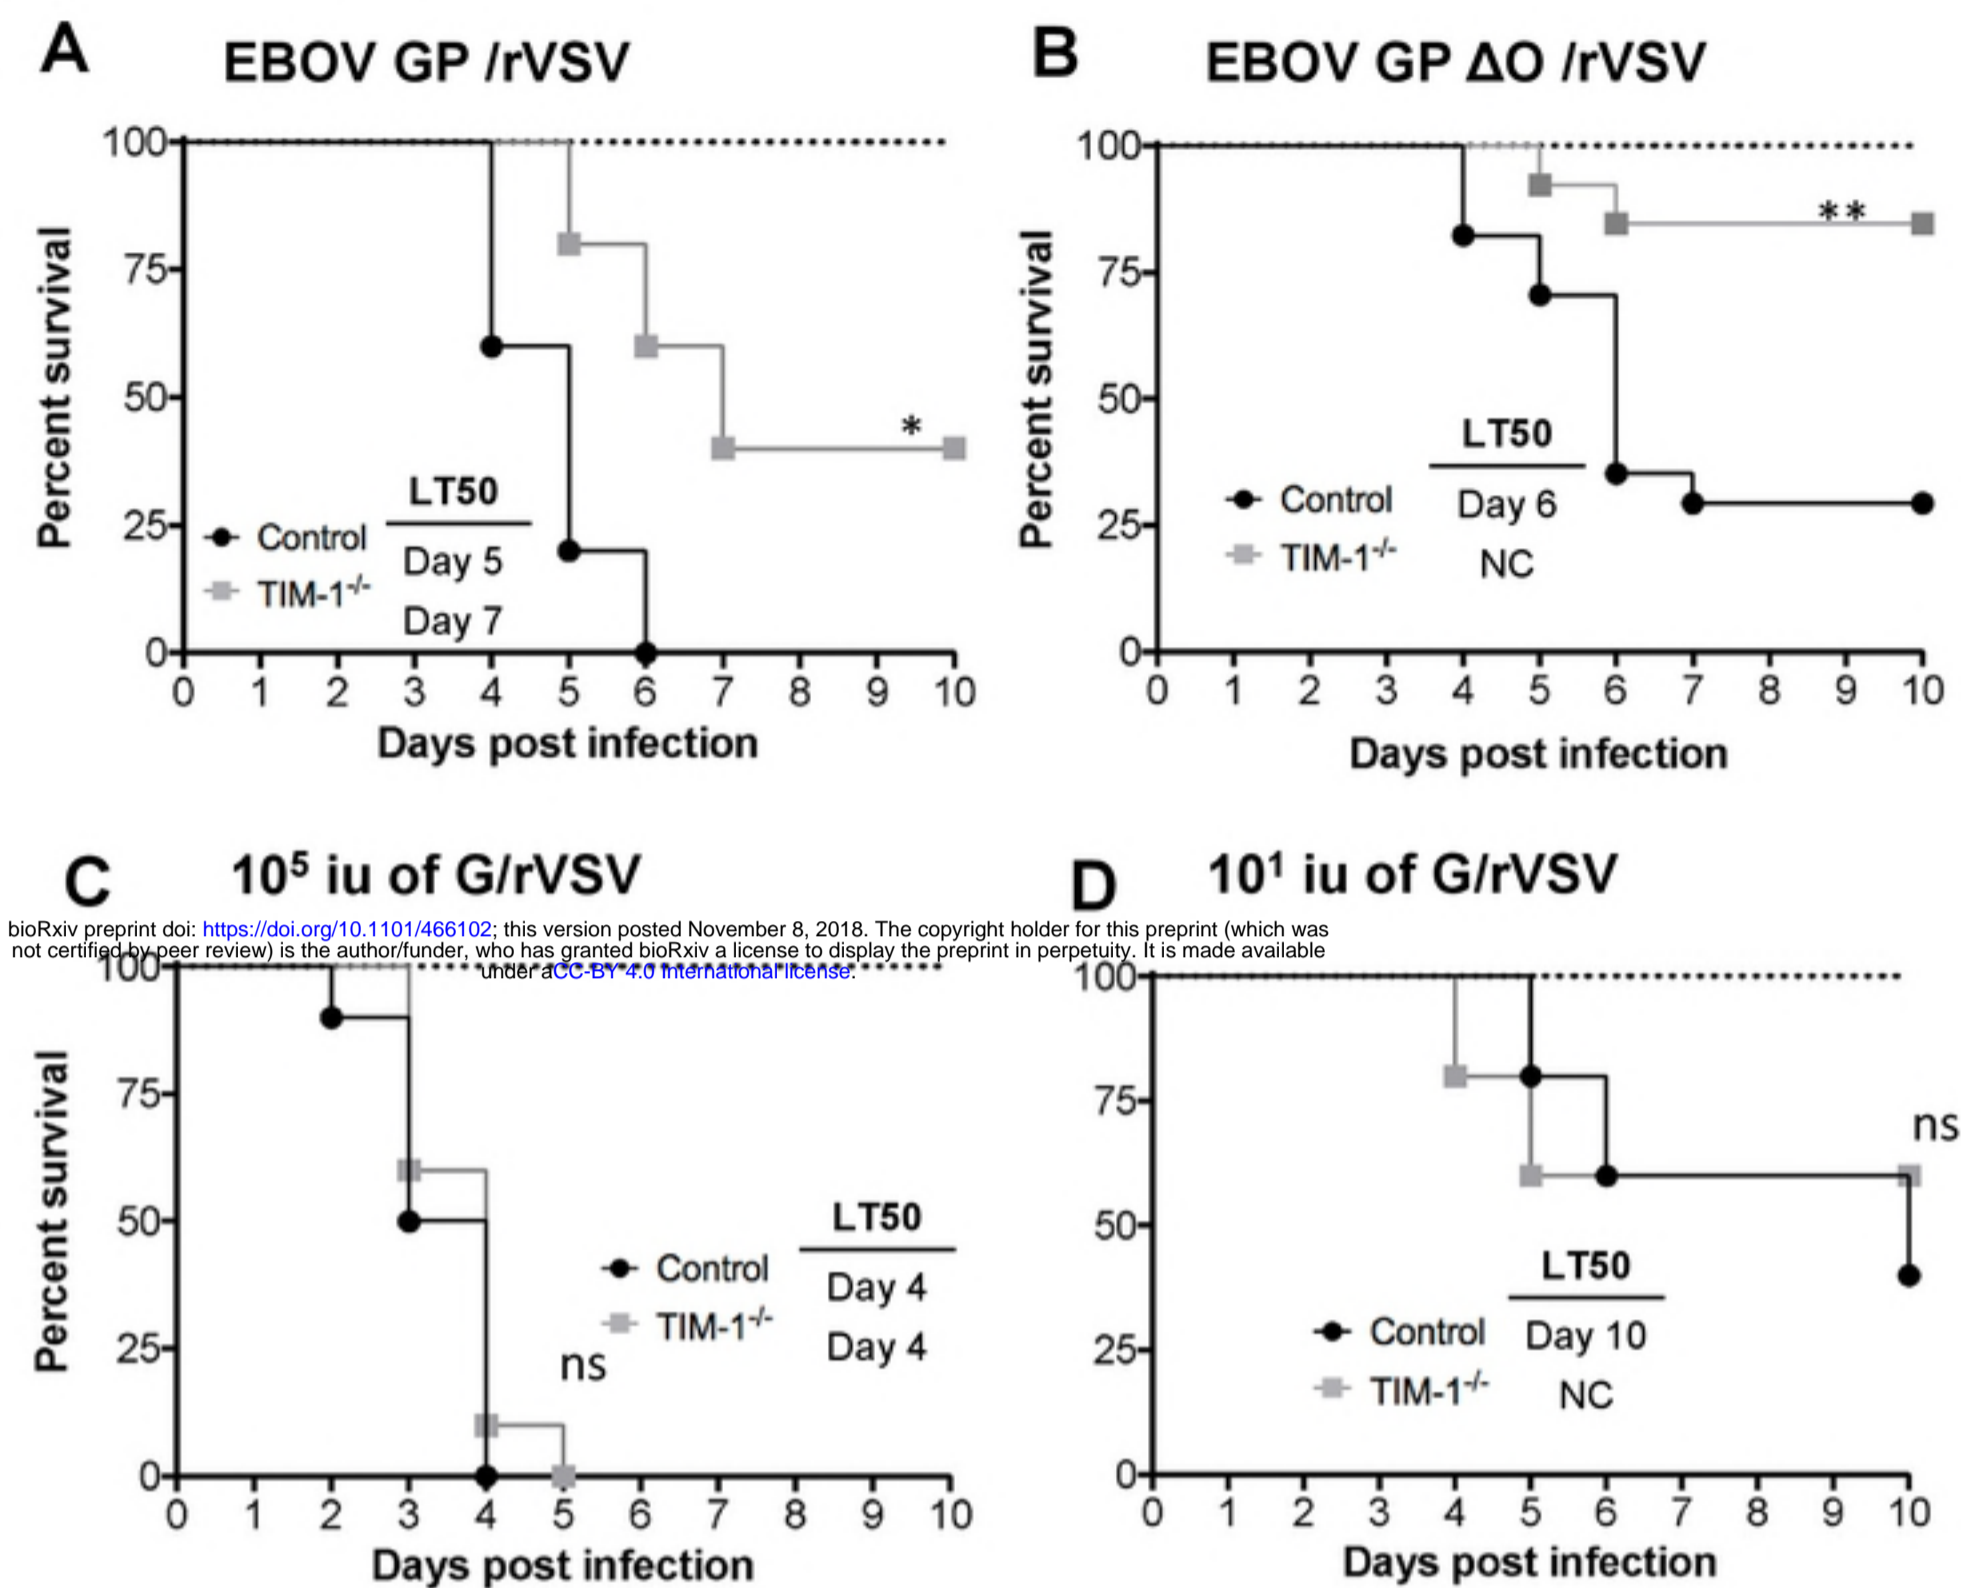

**Fig. 1. Loss of TIM-1 reduces mortality following EBOV GP/rVSV and EBOV GP ΔO/rVSV infection, but not G/rVSV.**

A and B. Female BALB/c *Ifnar*<sup>-/-</sup> (control) and BALB/c *Ifnar*/TIM-1<sup>-/-</sup> (TIM-1<sup>-/-</sup>) mice infected with 10<sup>5</sup> iu EBOV GP/rVSV (A; n = 5 mice per group) or EBOV GP ΔO/rVSV (B; n = 13-17 mice per group) by intravenous injection. C. Female BALB/c *Ifnar*<sup>-/-</sup> (control) and BALB/c *Ifnar*/TIM-1<sup>-/-</sup> (TIM-1<sup>-/-</sup>) mice infected with 10<sup>5</sup> iu G/rVSV (n = 10 mice per group). D. Similar G/rVSV challenge studies as shown in panel C, but mice were challenged with 10<sup>1</sup> iu (n = 5 mice per group) of G/rVSV. Survival was assessed following infection for all mouse studies. Significance for survival curve was determined by Log Rank (Mantel-Cox) test, \* p < 0.05, \*\*p < 0.01. LT50 = median lethal time until death; NC = noncalculable.

Fig. 1

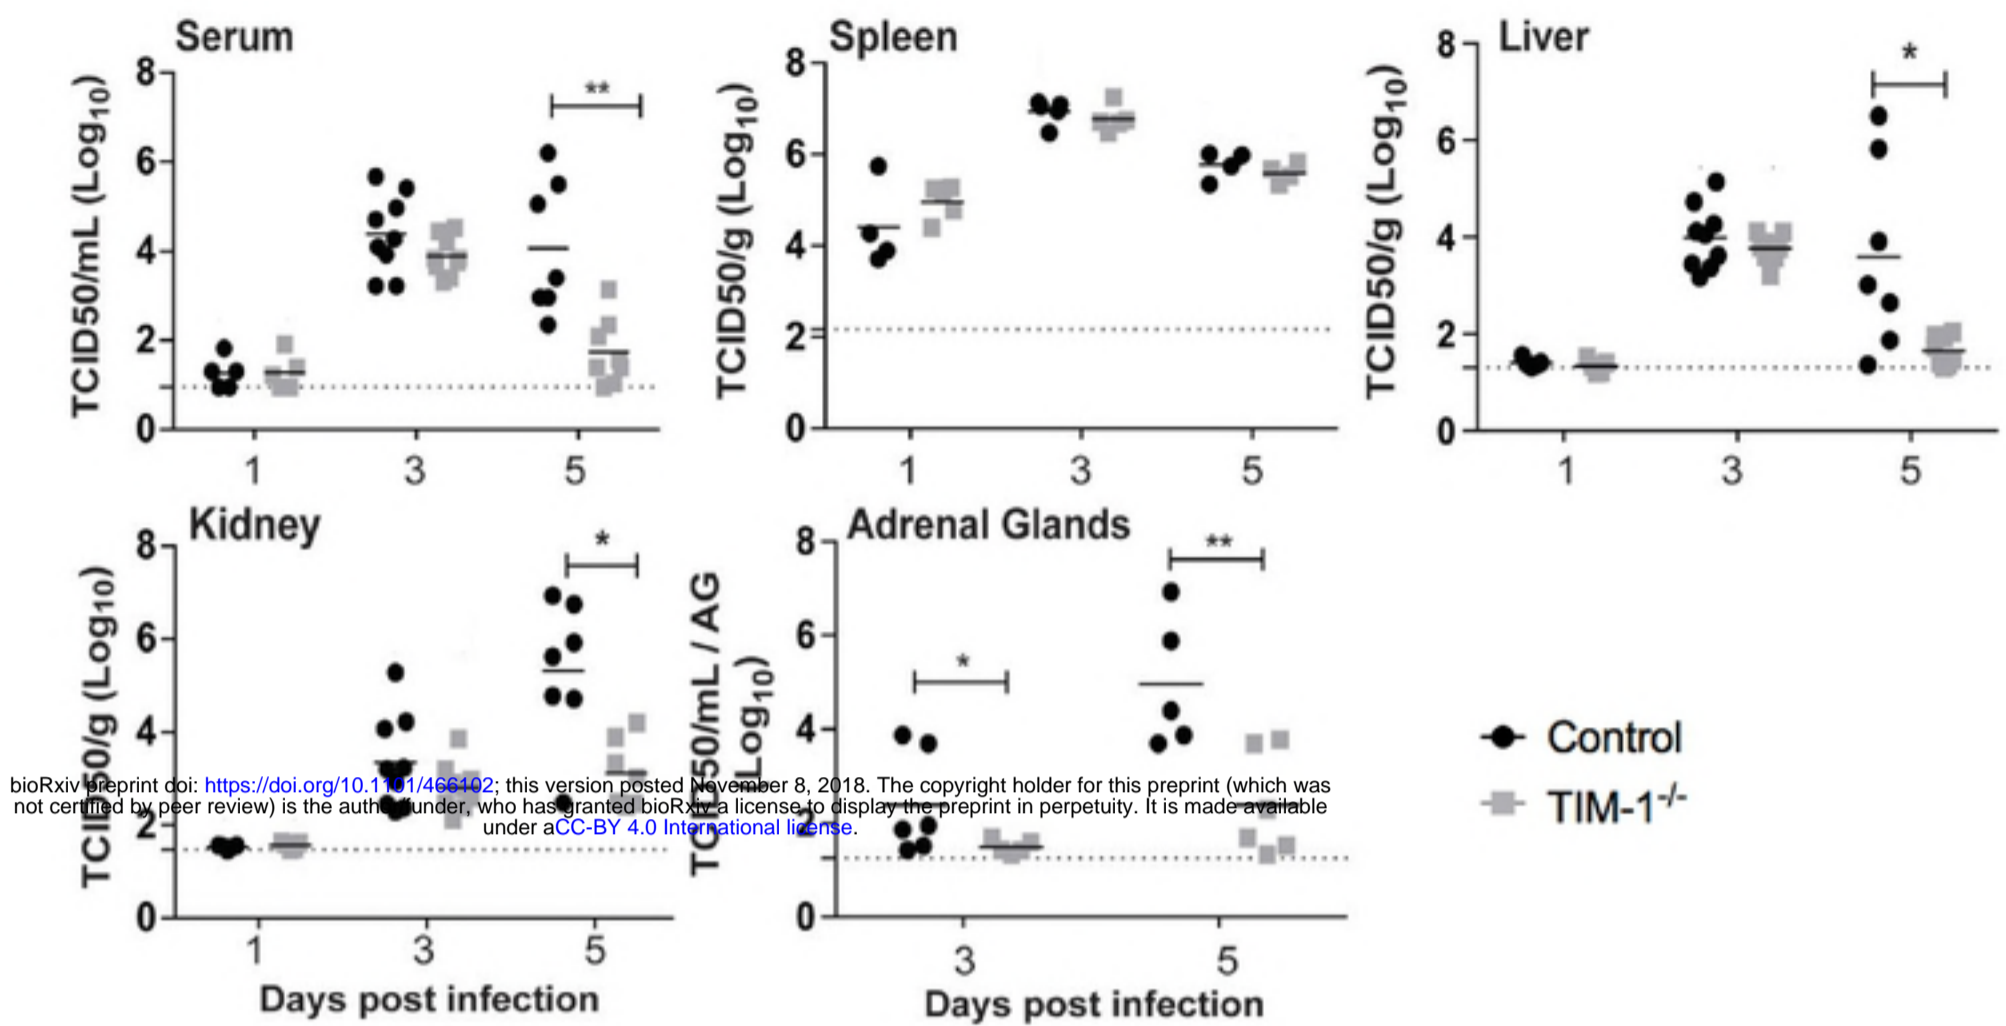

**Fig. 2. Reduced viremia and viral loads in a variety of organs of TIM-1<sup>-/-</sup> mice at late time points following i.v. EBOV GP ΔO/rVSV infection.**

Sera and organs were harvested from BALB/c *Ifnar*<sup>-/-</sup> (control) and BALB/c *Ifnar*/TIM-1<sup>-/-</sup> (TIM-1<sup>-/-</sup>) mice at days 1, 3 and 5 following infection with 10<sup>5</sup> iu of EBOV GP ΔO /rVSV by i.v. injection. Titers were determined by endpoint dilution of serum or homogenized organ samples on Vero cells. Solid lines indicate geometric mean for each data set. Dotted line indicates the level of detection. Adrenal gland (AG) titers are displayed as per AG homogenized in 1 ml of PBS. Significance was calculated by Mann-Whitney test to compare control to TIM-1<sup>-/-</sup> mice at each time point, \**p* < 0.05, \*\**p* < 0.01. ns, not significant.

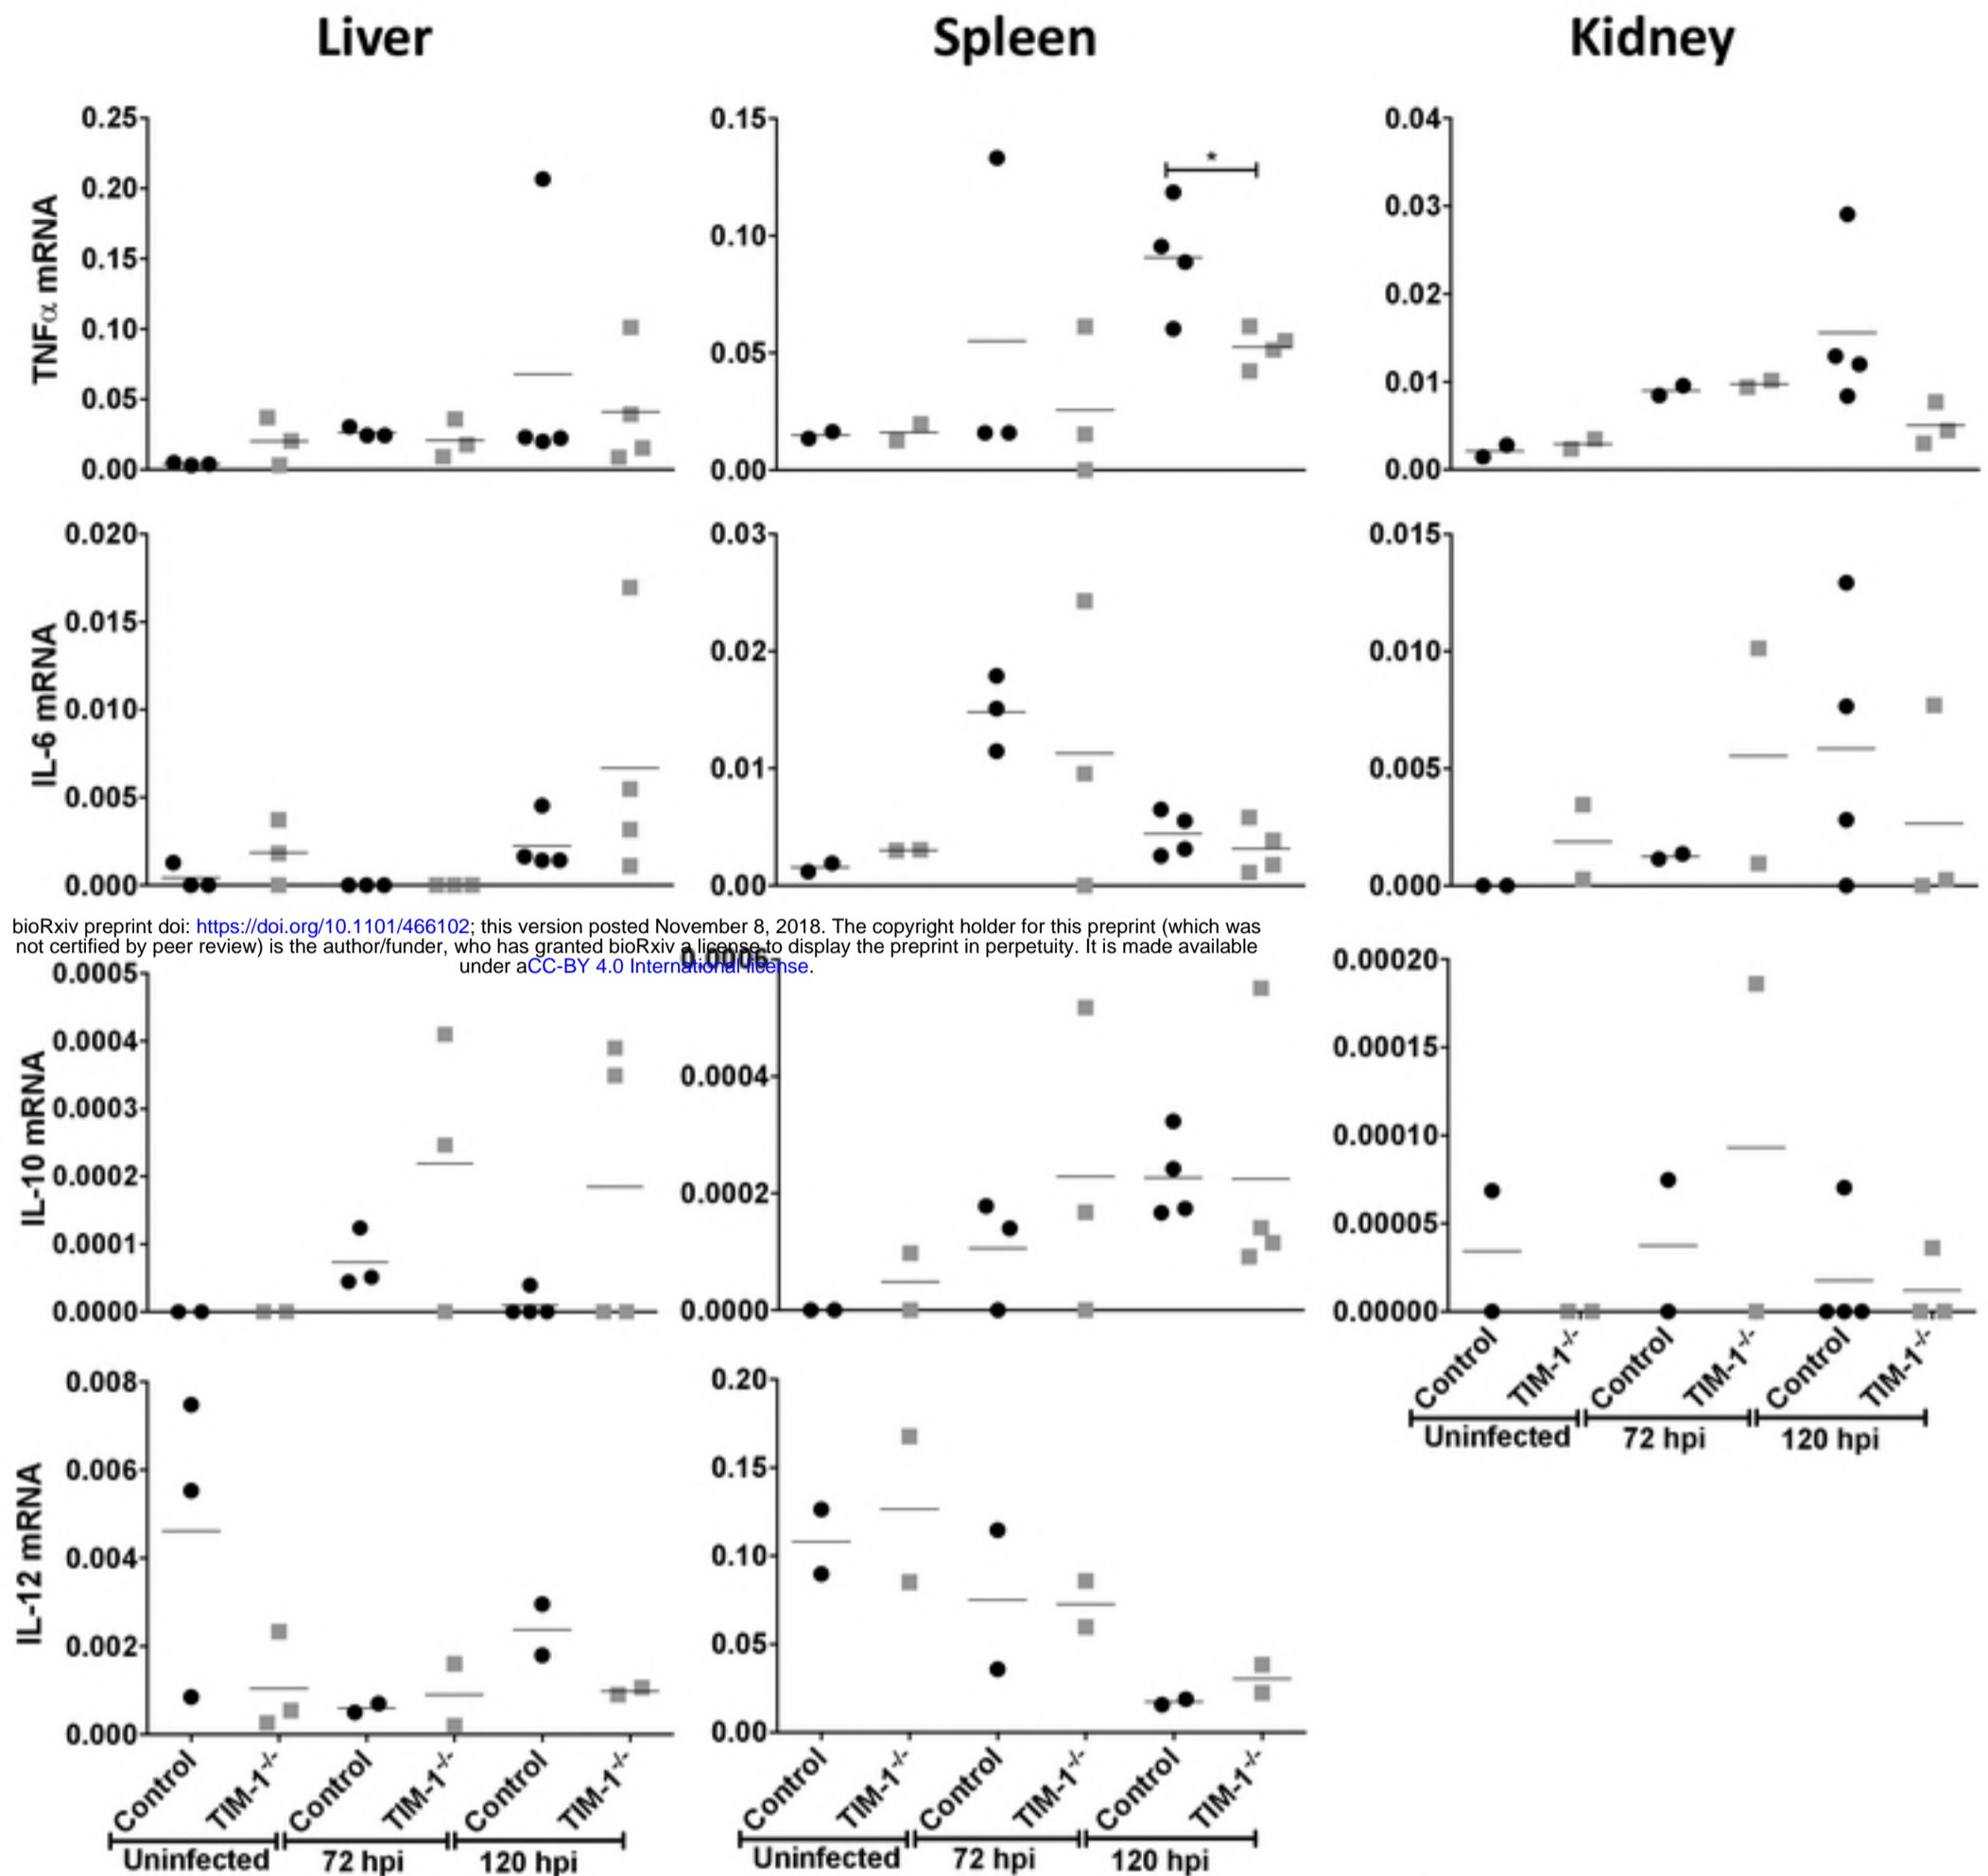

**Fig. 3. Cytokine expression in liver, spleen and kidney of EBOV GPΔO/rVSV-infected *Ifnar*<sup>-/-</sup> and *Ifnar*/*TIM-1*<sup>-/-</sup> mice.**

Tissues were harvested from uninfected and infected BALB/c *Ifnar*<sup>-/-</sup> (control) and BALB/c *Ifnar*/*TIM-1*<sup>-/-</sup> (*TIM-1*<sup>-/-</sup>) mice. For infection studies, tissues were harvested at 3 or 5 days following infection with 10<sup>5</sup> iu of EBOV GPΔO/rVSV by i.v. injection. RNA was isolated from the organs and expression of mouse TNF, IL-6, IL-10 and IL-12, were quantified by qRT-PCR. Results represent cytokines expression relative to murine HPRT for at least three independent livers, spleens and kidneys. Data points represent values for individual mice. Solid lines indicate the mean for each data set. Statistical significance was determined by Student's t-test compared the control mice for each time point and is only shown for those comparisons observed to be different, \*p<0.05.

Fig.3



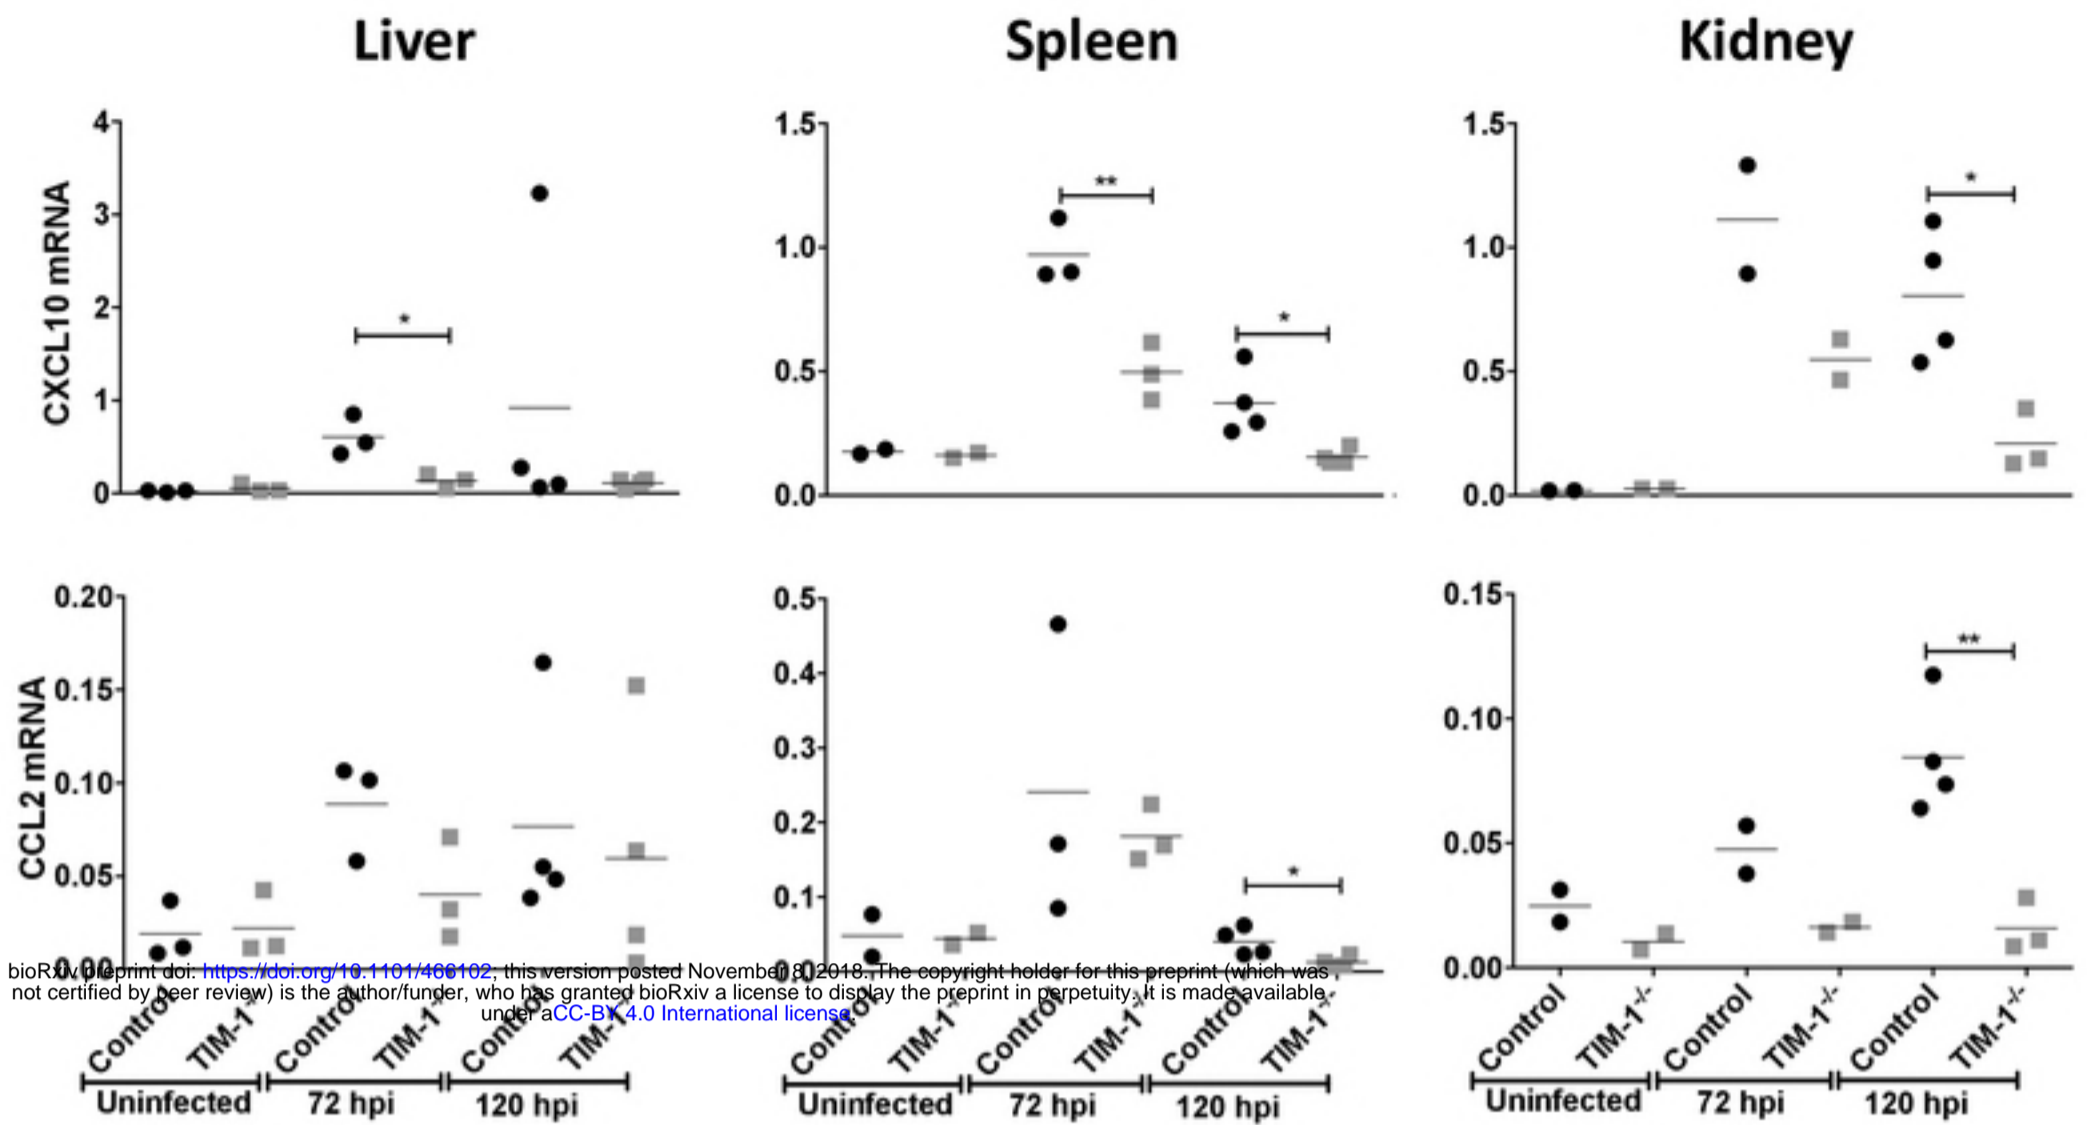

**Fig. 4. Chemokine CXCL10 and CCL2 expression in the liver, spleen and kidney of EBOV GP $\Delta$ O/rVSV-infected control and TIM-1<sup>-/-</sup> mice.**

Tissues were harvested from uninfected and infected BALB/c *Ifnar*<sup>-/-</sup> (control) and BALB/c *Ifnar*/TIM-1<sup>-/-</sup> (TIM-1<sup>-/-</sup>) mice. For infection studies, tissues were harvested at 3 or 5 days following infection with 10<sup>5</sup> iu of EBOV GP $\Delta$ O/rVSV by i.v. injection. RNA was isolated from the organs and proinflammatory chemokines, mouse CXCL10 and CCL2, were quantified by qRT-PCR. Results represent chemokine expression relative to murine HPRT for at least three independent livers, spleens and kidneys. Data points represent values for individual mice. Solid lines indicate the mean for each data set. Statistical significance was determined by Student's t-test compared the control mice for each time point and is only shown for those comparisons observed to differ, \*p<0.05.

Fig. 4

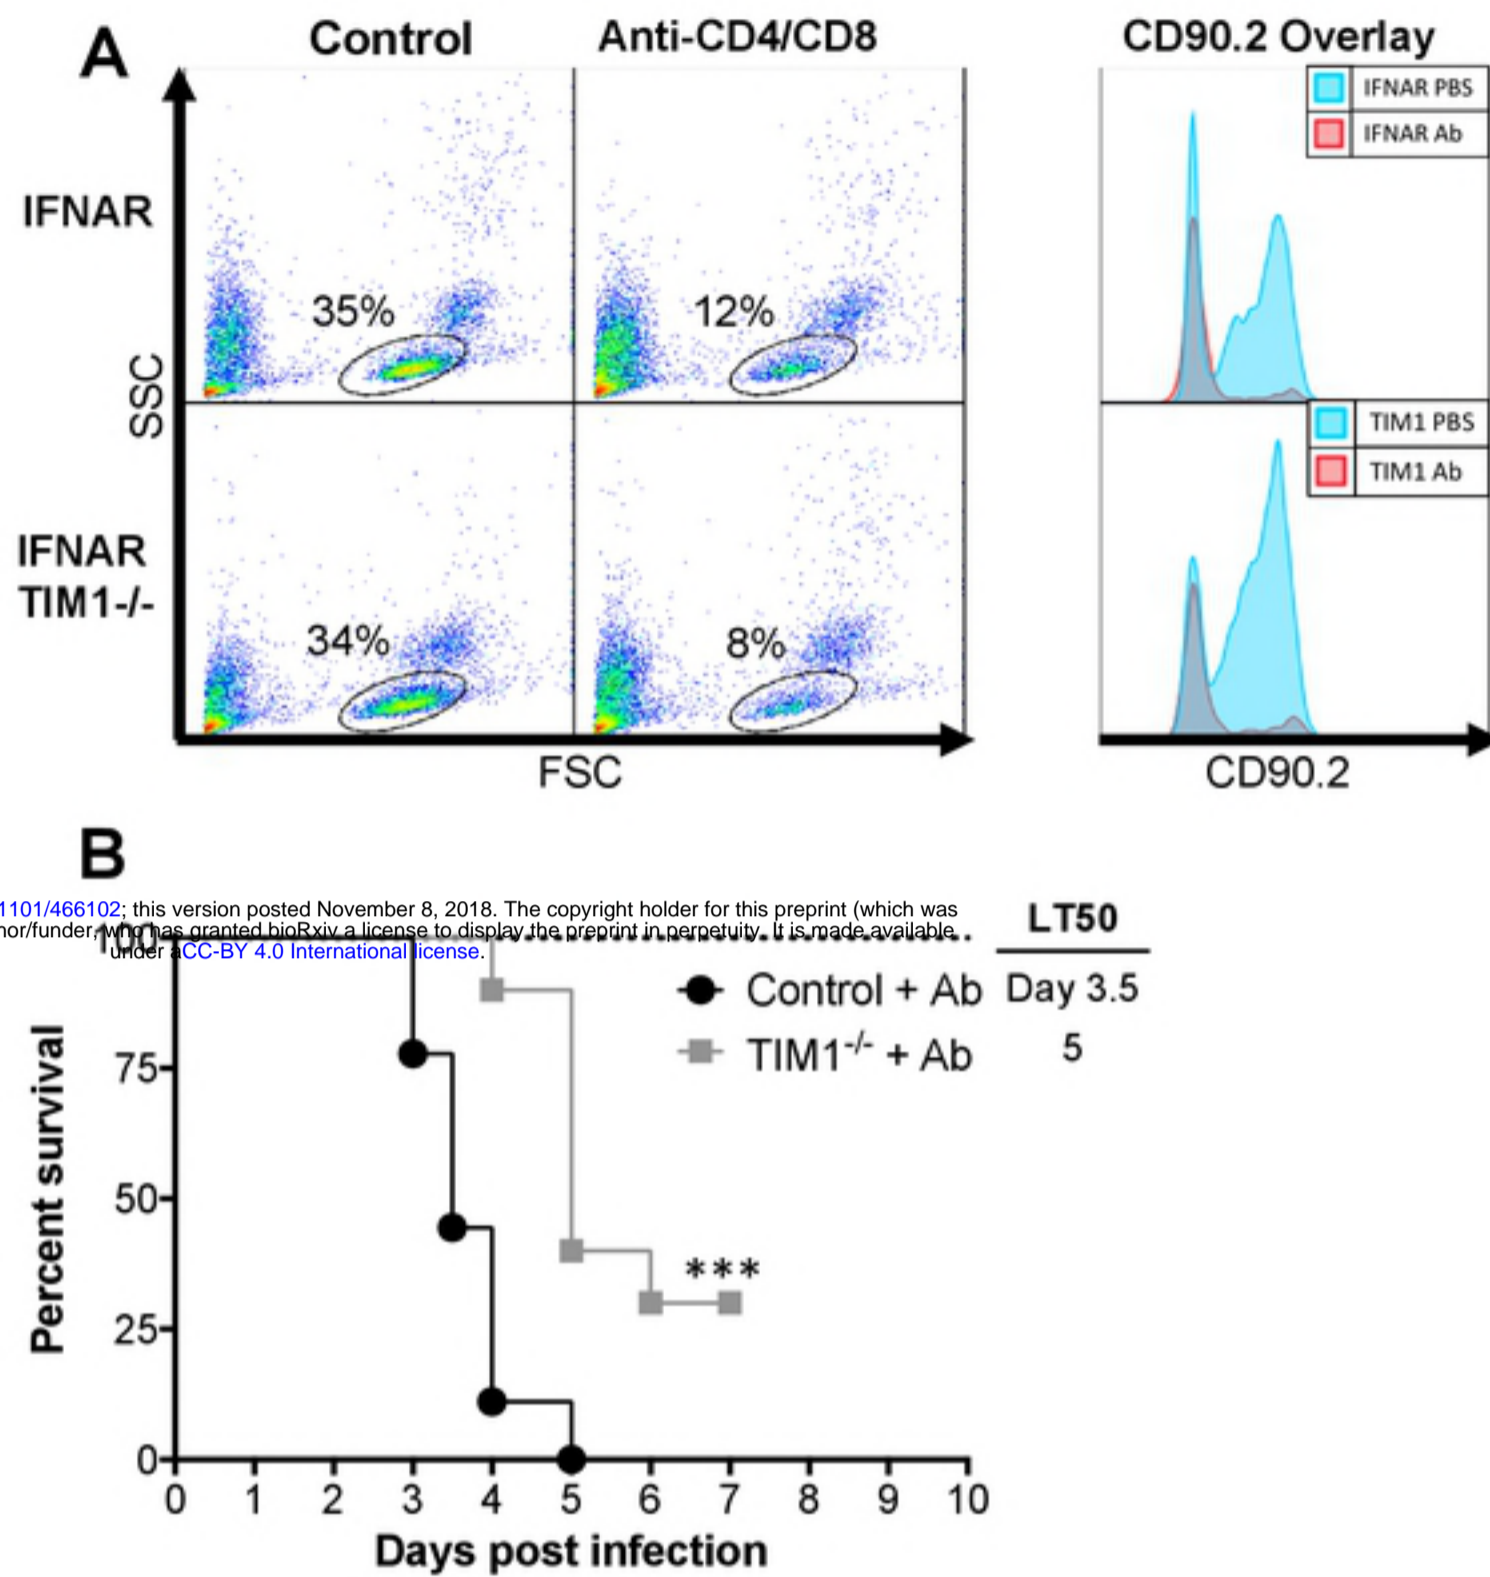

**Fig. 5. T cell depletion does not alter the survival protection conferred by the loss of TIM-1 expression.**

A. Intraperitoneal injection of  $\alpha$ -CD8 mAb, clone 2.43, and  $\alpha$ -CD4 mAb, clone GK1.5, treatment at days -1 and 2 systemically depletes T cell populations in Female BALB/c *Ifnar*<sup>-/-</sup> (Control) and BALB/c *Ifnar*<sup>-/-</sup>/TIM-1<sup>-/-</sup> (TIM-1<sup>-/-</sup>) mice as determined by  $\alpha$ -CD90 mAb staining of peripheral blood mononuclear cells at day 5 following EBOV GP/rVSV infection. CD90.2 overlay depicts the subset of cells gated in the panel on the left. B. Survival was assessed following infection with  $7 \times 10^2$  iu of EBOV GP/rVSV administered by intravenous infection (n = 10 mice per group) and two treatments of  $\alpha$ -CD8 mAb and  $\alpha$ -CD4 mAb at Day -1 and 2 from infection. Significance for survival curve was determined by Log Rank (Mantel-Cox) test, \*\*\*p < 0.001.
